# Supplementary material for: Effect of Indole-Containing Pyrazino[2,1-b]quinazoline-3,6-diones in the Virulence of Resistant Bacteria
Source: MDPI journal article supplement (doi:10.3390/antibiotics12050922), 2023-05-17
Supplement: s1 [file s1]

# Supporting Information

## Effect of Indole-Containing Pyrazino[2,1-b]quinazoline-3,6-diones in the Virulence of Resistant Bacteria

Mariana C. Almeida<sup>1,2</sup>, Nikolett Szemerédi<sup>3</sup>, Fernando Durães<sup>1,2</sup>, Solida Long<sup>1,4</sup>, Diana I. S. P. Resende<sup>1,2\*</sup>, Paulo Martins da Costa<sup>2,5</sup>, Madalena Pinto<sup>1,2</sup>, Gabriella Spengler<sup>3</sup>, Emília Sousa<sup>1,2\*</sup>

<sup>1</sup> Laboratório de Química Orgânica e Farmacêutica, Faculdade de Farmácia, Universidade do Porto, Rua de Jorge Viterbo Ferreira 228, 4050-313 Porto, Portugal;

<sup>2</sup> CIIMAR - Centro Interdisciplinar de Investigação Marinha e Ambiental, Terminal de Cruzeiros do Porto de Leixões, 4450-208 Matosinhos, Portugal

<sup>3</sup> Department of Medical Microbiology, Albert Szent-Gyorgyi Health Center and Albert Szent-Gyorgyi Medical School, University of Szeged, Hungary.

<sup>4</sup> Department of Bioengineering, Royal University of Phnom Penh, Russian Confederation Blvd, 12156 Phnom Penh, Cambodia

<sup>5</sup> ICBAS – Instituto de Ciências Biomédicas Abel Salazar, Universidade do Porto, Rua de Jorge Viterbo Ferreira 228, 4050-313 Porto, Portugal

\*Correspondence: D. I. S. P. R. – dresende@ff.up.pt, E. S. – esousa@ff.up.pt

### Table of Contents

|                                   |    |
|-----------------------------------|----|
| 1. NMR Data .....                 | 2  |
| 2. HRMS Data .....                | 26 |
| 3. HPLC-DAD Purity Data .....     | 28 |
| 4. Enantiomeric Excess Data ..... | 31 |

## 1. NMR Data

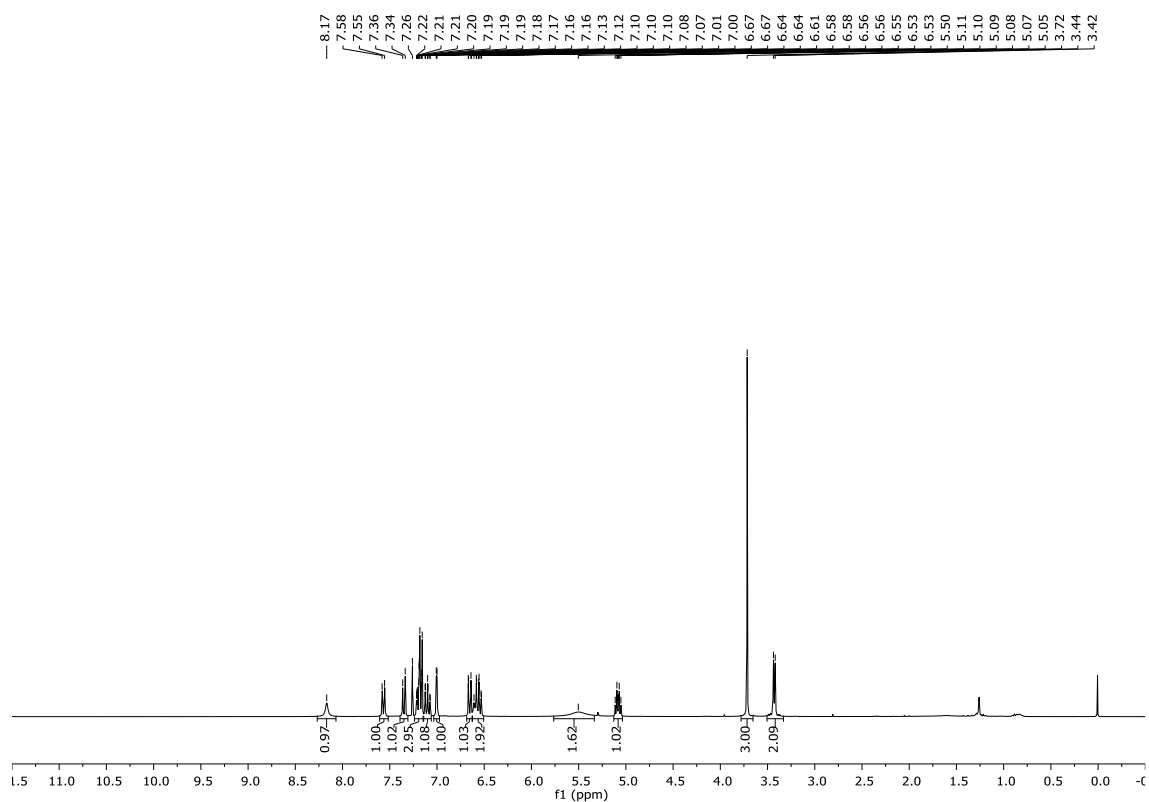

**Figure S1**  $^1\text{H}$ -NMR (300 MHz,  $\text{CDCl}_3$ ) spectrum of methyl (2-aminobenzoyl)-D-tryptophanate (8a).

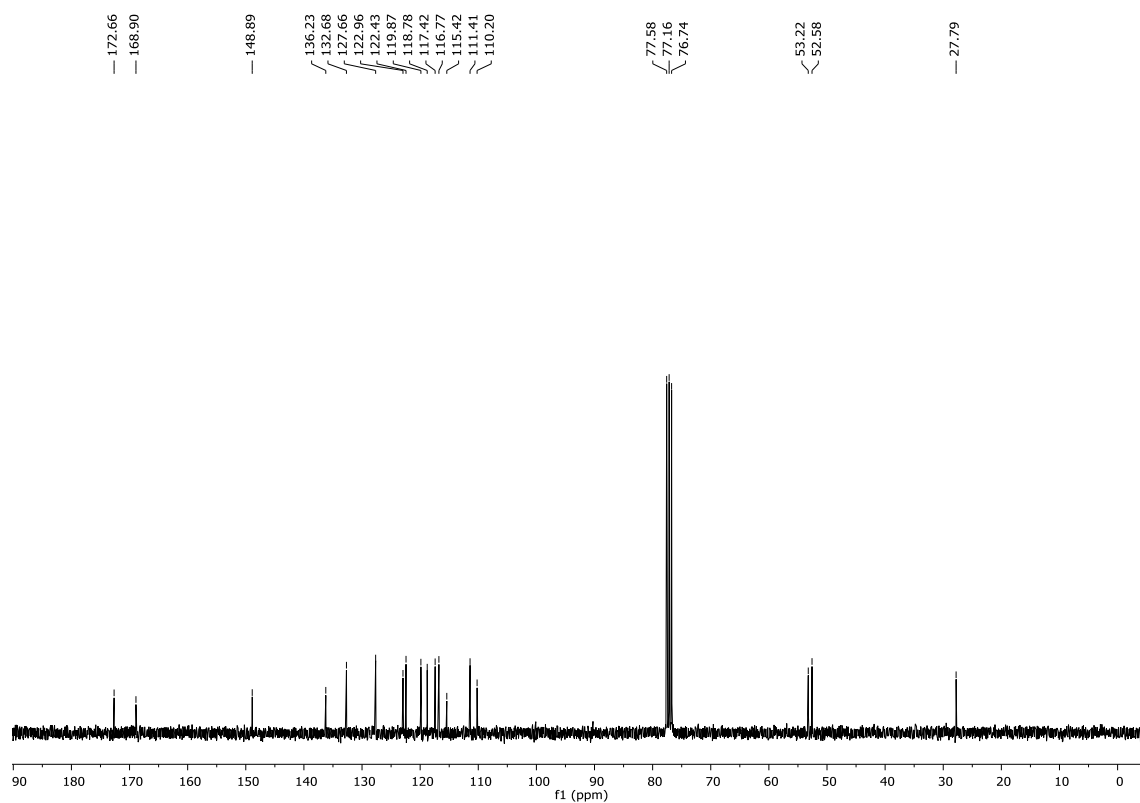

**Figure S2**  $^{13}\text{C}$ -NMR (75 MHz,  $\text{CDCl}_3$ ) spectrum for methyl (2-aminobenzoyl)-D-tryptophanate (**8a**).

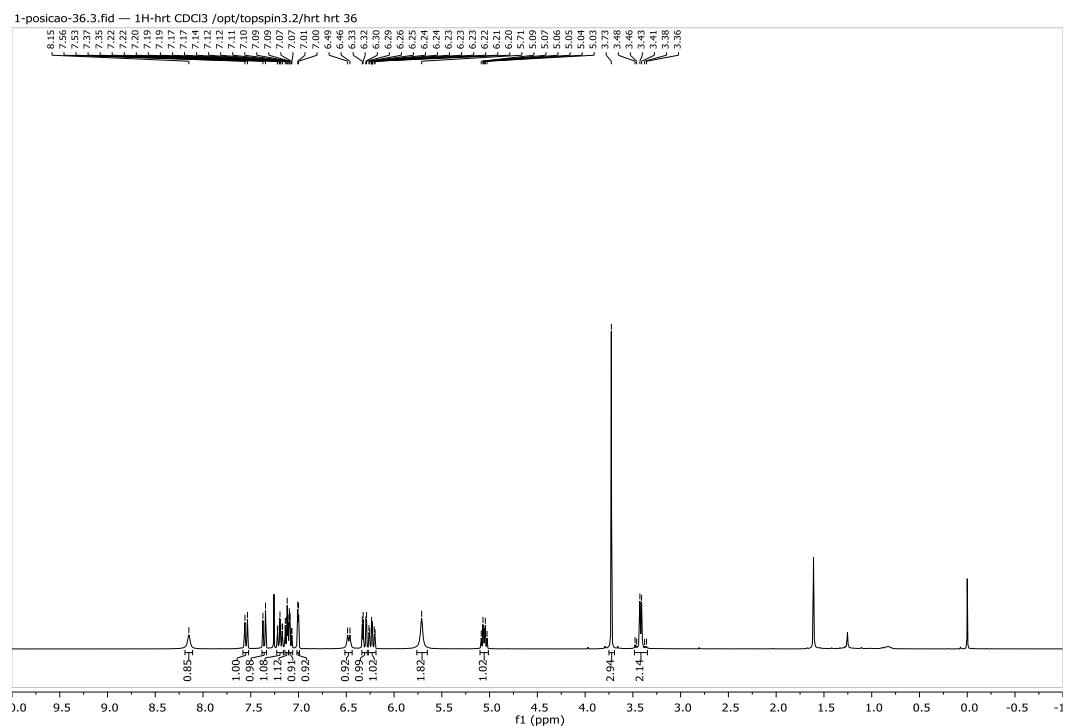

**Figure S3**  $^1\text{H}$ -NMR (300 MHz,  $\text{CDCl}_3$ ) spectrum for methyl (2-amino-4-fluorobenzoyl)-D-tryptophanate (**8b**).

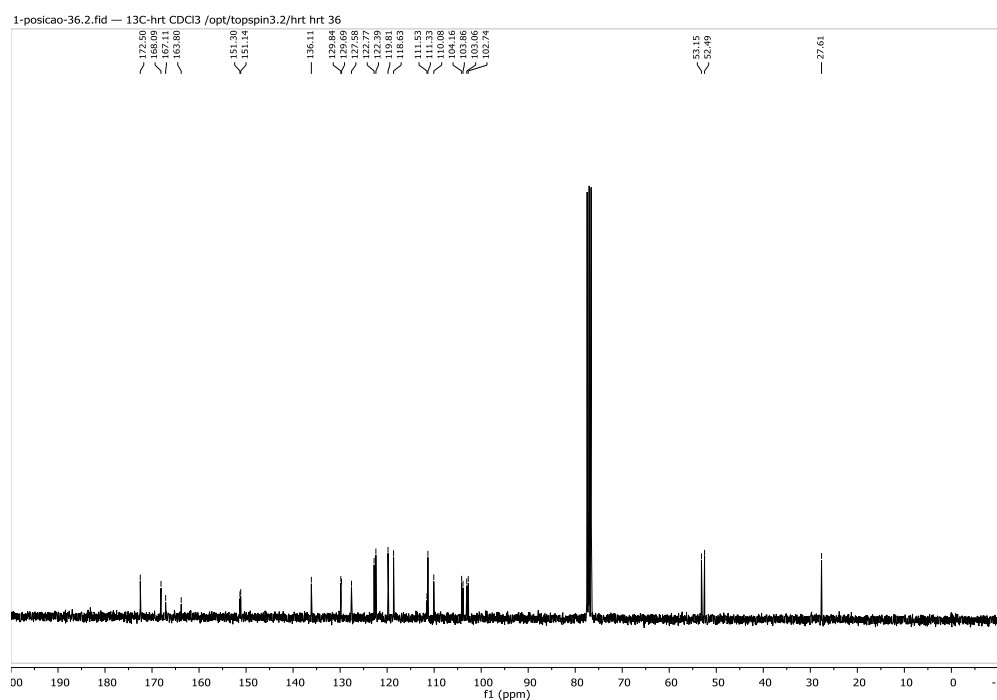

**Figure S4**  $^{13}\text{C}$ -NMR (75 MHz,  $\text{CDCl}_3$ ) spectrum for methyl (2-amino-4-fluorobenzoyl)-D-tryptophanate (**8b**).

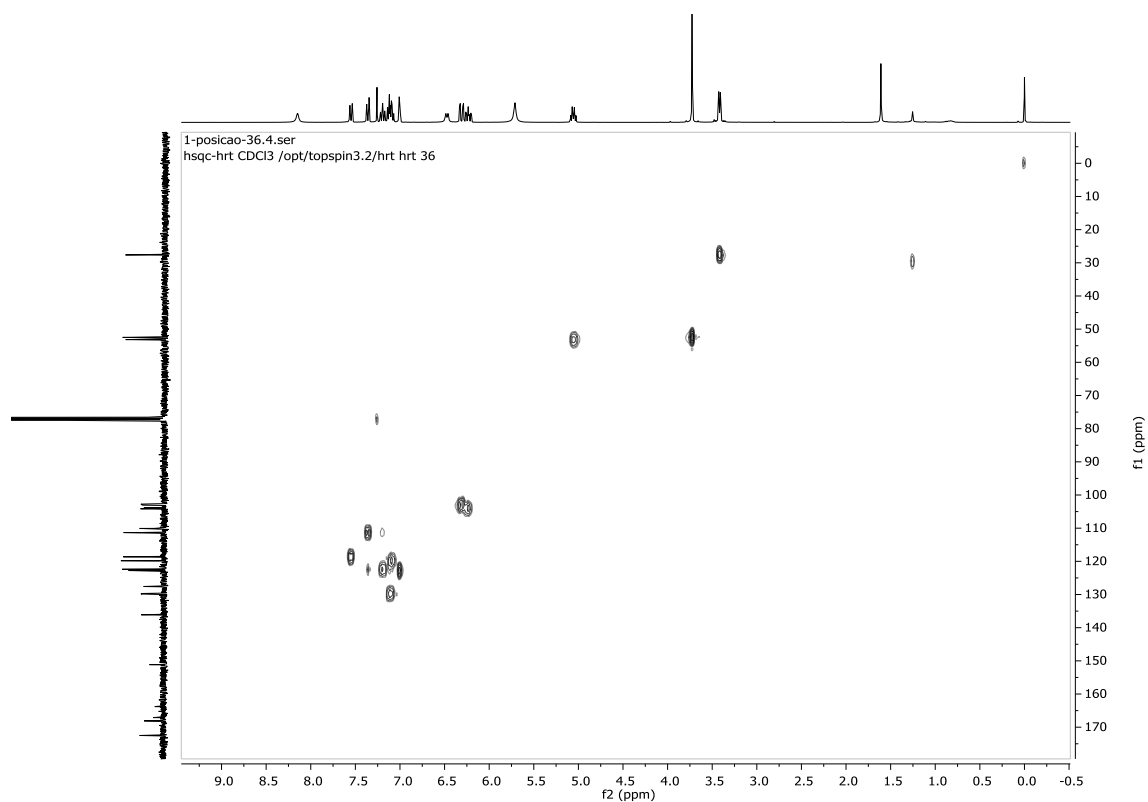

**Figure S5** HSQC spectrum for methyl (2-amino-4-fluorobenzoyl)-D-tryptophanate (**8b**).



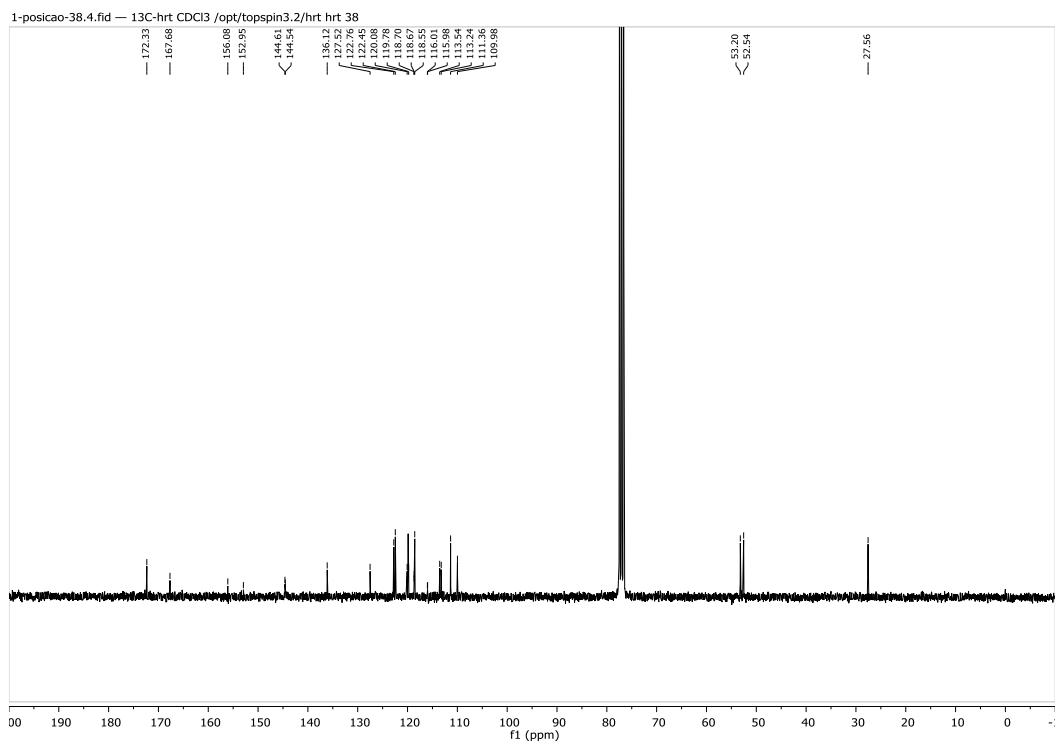

**Figure S8** <sup>13</sup>C-NMR (75 MHz, CDCl<sub>3</sub>) spectrum for methyl (2-amino-5-fluorobenzoyl)-D-tryptophanate (**8c**).

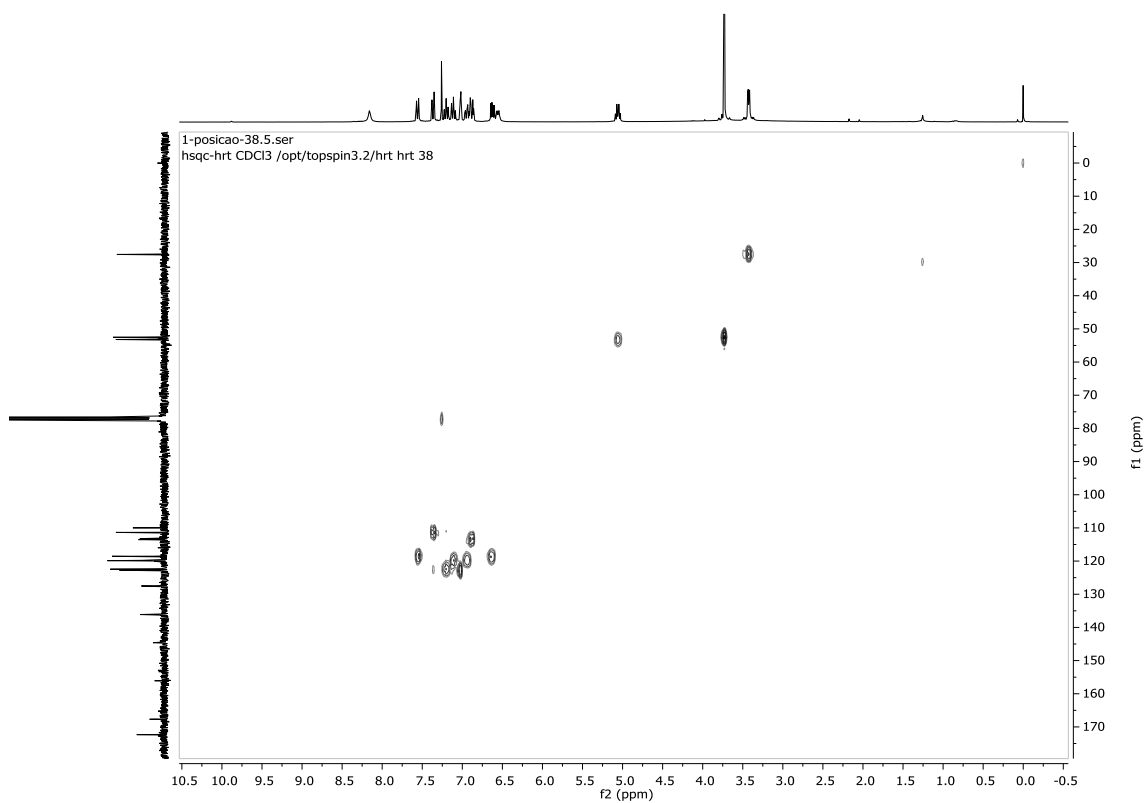

**Figure S9** HSQC spectrum for methyl (2-amino-5-fluorobenzoyl)-D-tryptophanate (**8c**).

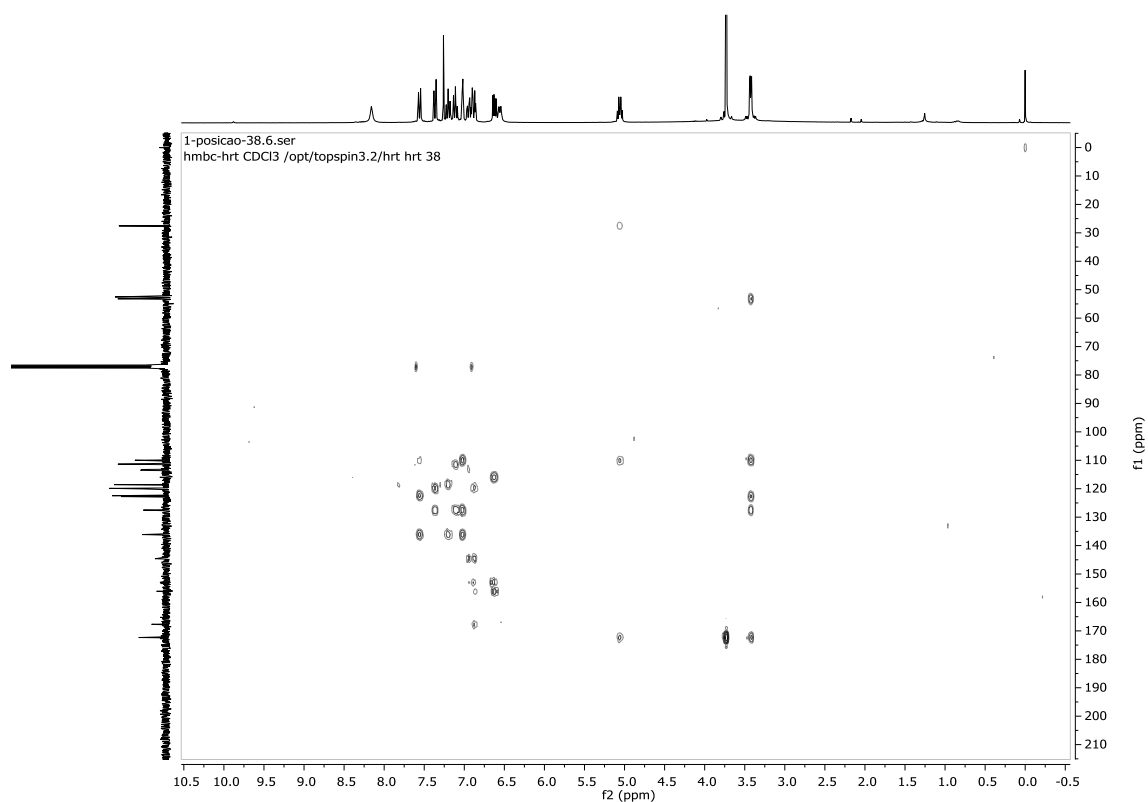

**Figure S10** HMBC spectrum for methyl (2-amino-5-fluorobenzoyl)-D-tryptophanate (**8c**).

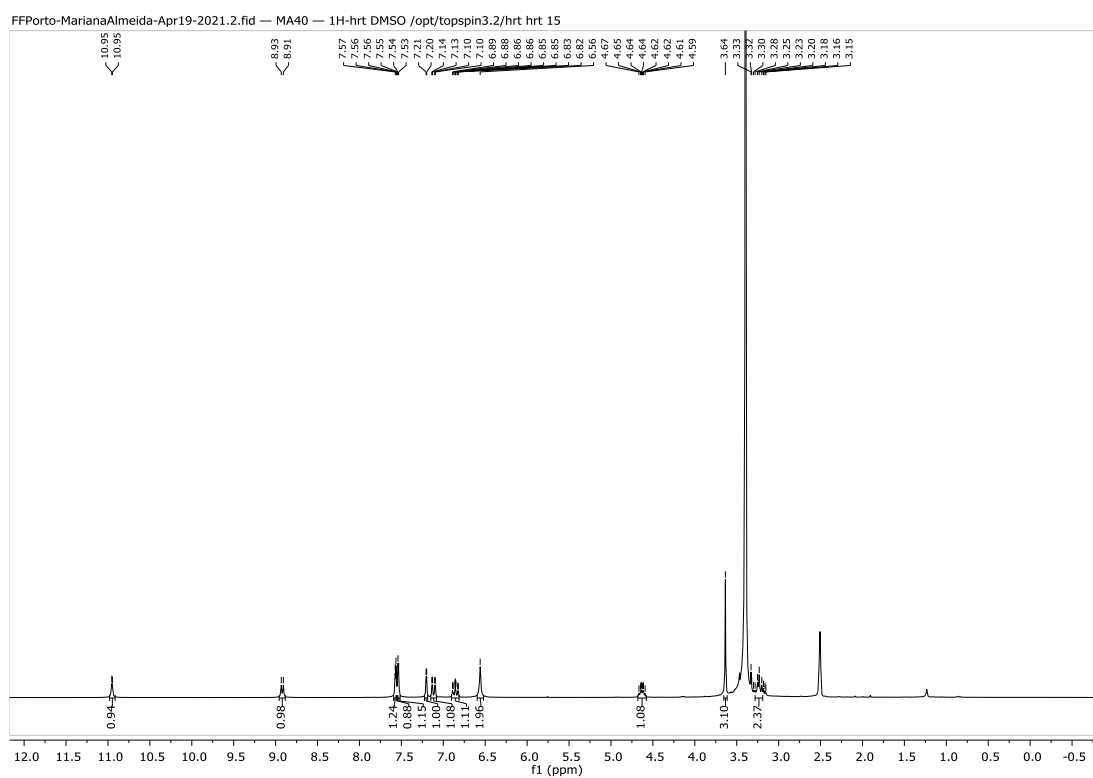

**Figure S11**  $^1\text{H}$  NMR (300 MHz, DMSO- $d_6$ ) spectrum for (S)-2-(2-amino-3,5-dichlorobenzamido)-3-(6-fluoro-1H-indol-3-yl)propanoate (**8d**).

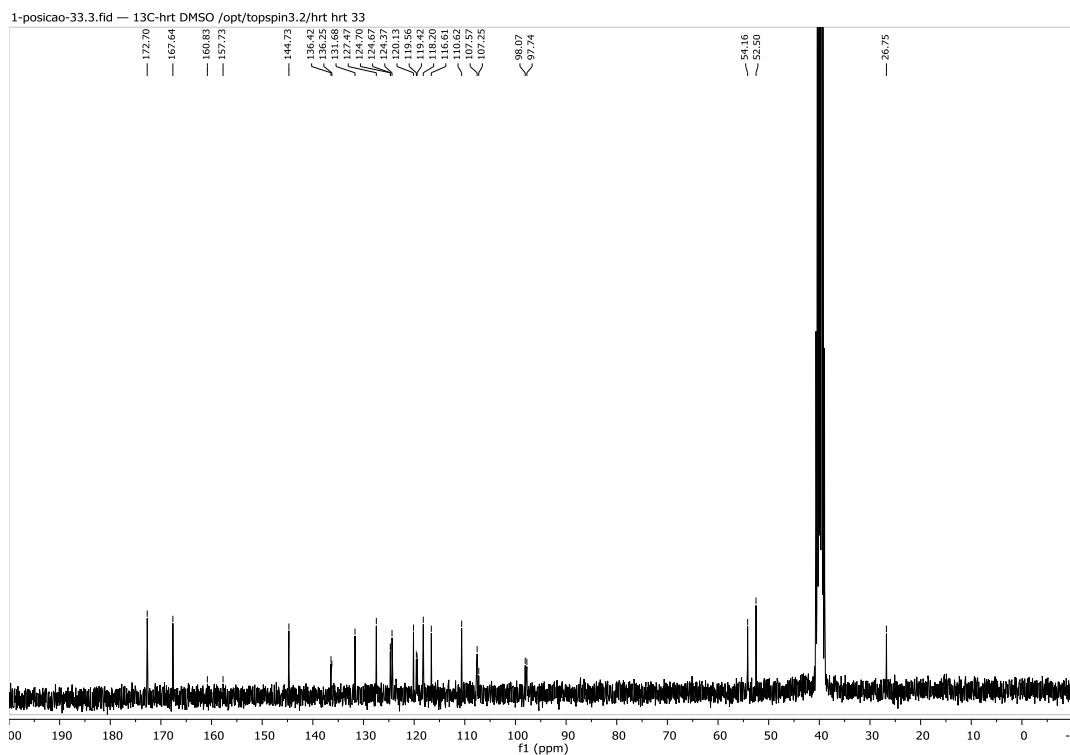

**Figure S12**  $^{13}\text{C}$  NMR (75 MHz,  $\text{DMSO-d}_6$ ) spectrum for (S)-2-(2-amino-3,5-dichlorobenzamido)-3-(6-fluoro-1*H*-indol-3-yl)propanoate (**8d**).

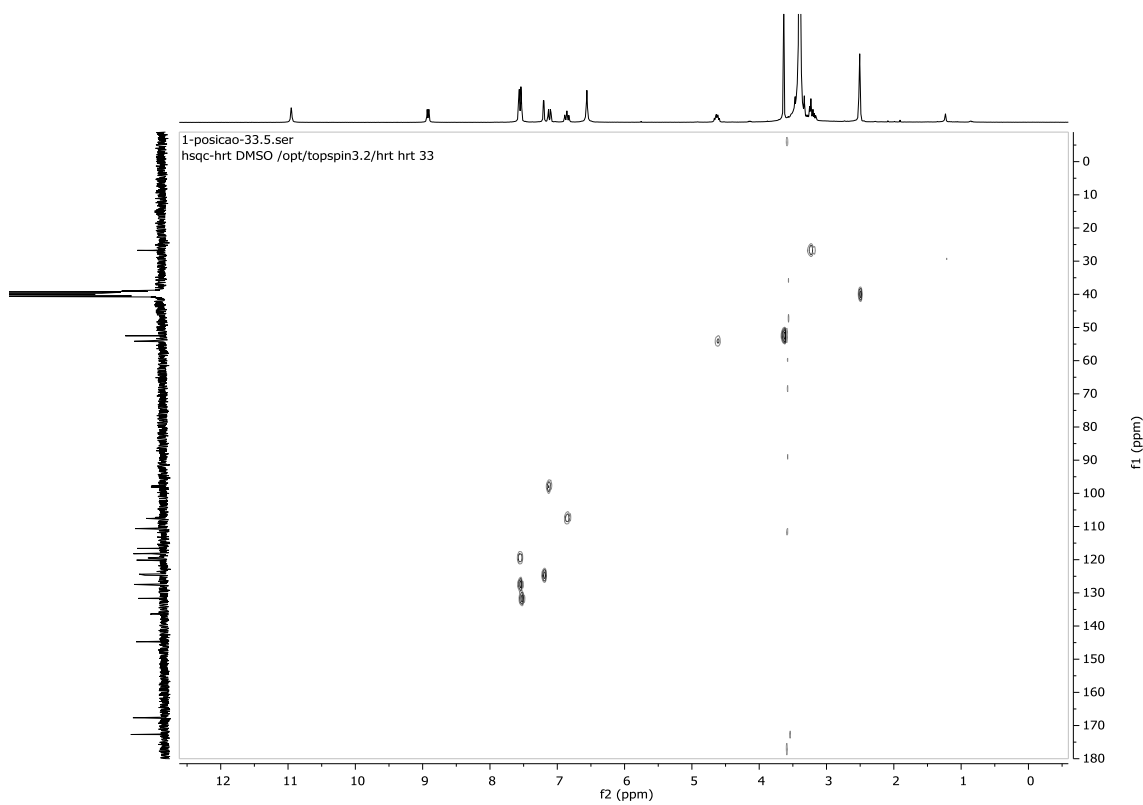

**Figure S13** HSQC spectrum for (S)-2-(2-amino-3,5-dichlorobenzamido)-3-(6-fluoro-1*H*-indol-3-yl)propanoate (**8d**).



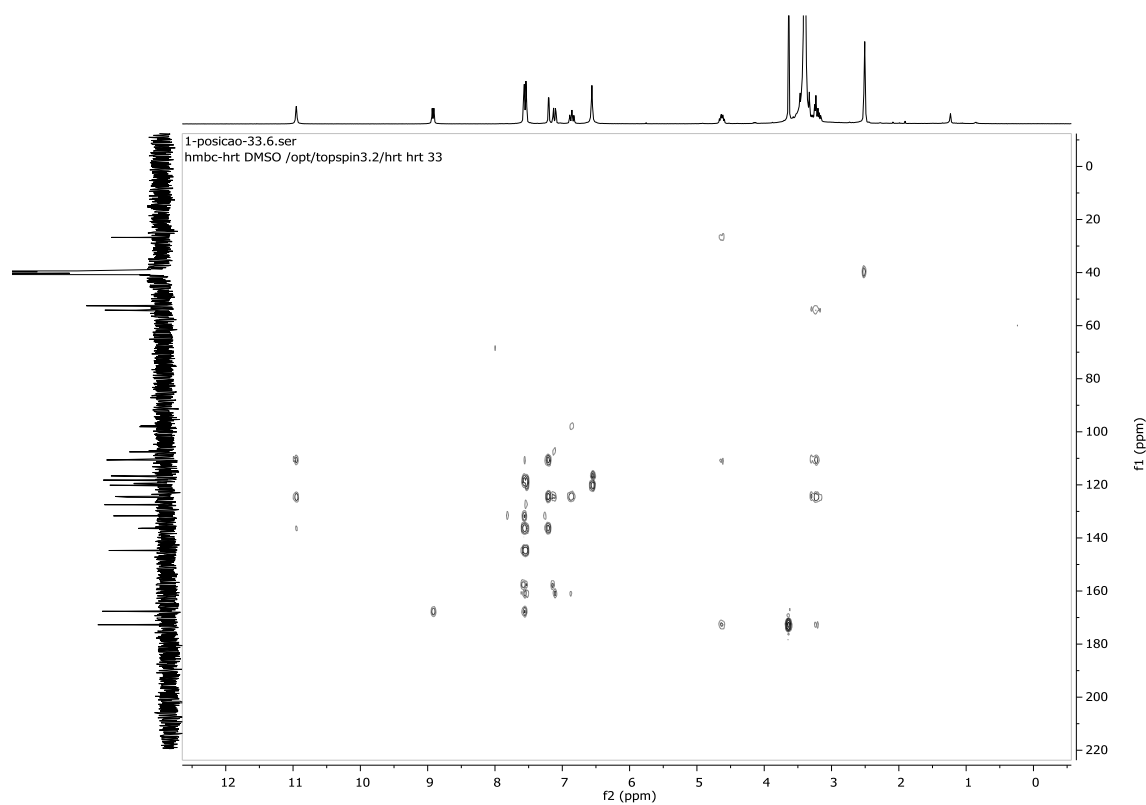

**Figure S14** HMBC spectrum for (S)-2-(2-amino-3,5-dichlorobenzamido)-3-(6-fluoro-1*H*-indol-3-yl)propanoate (**8d**).

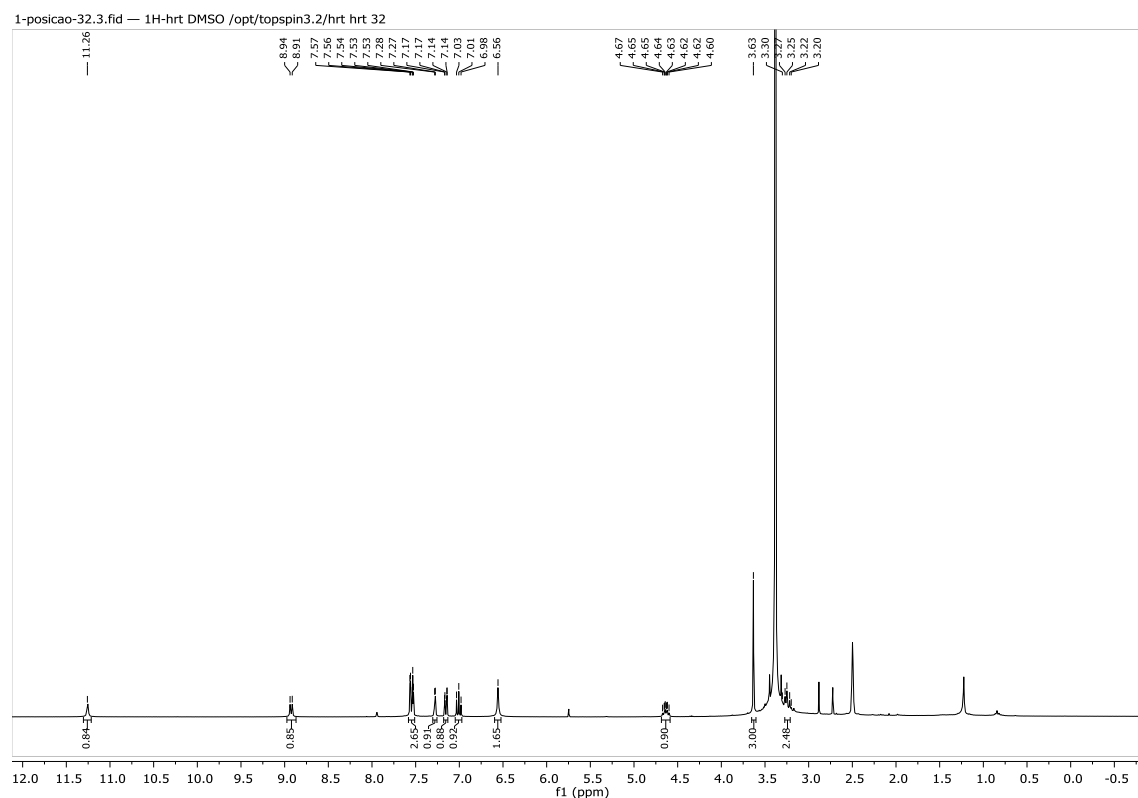

**Figure S15**  $^1\text{H}$  NMR (300 MHz,  $\text{DMSO-d}_6$ ) spectrum for (S)-2-(2-amino-3,5-dichlorobenzamido)-3-(7-chloro-1*H*-indol-3-yl)propanoate (**8e**).

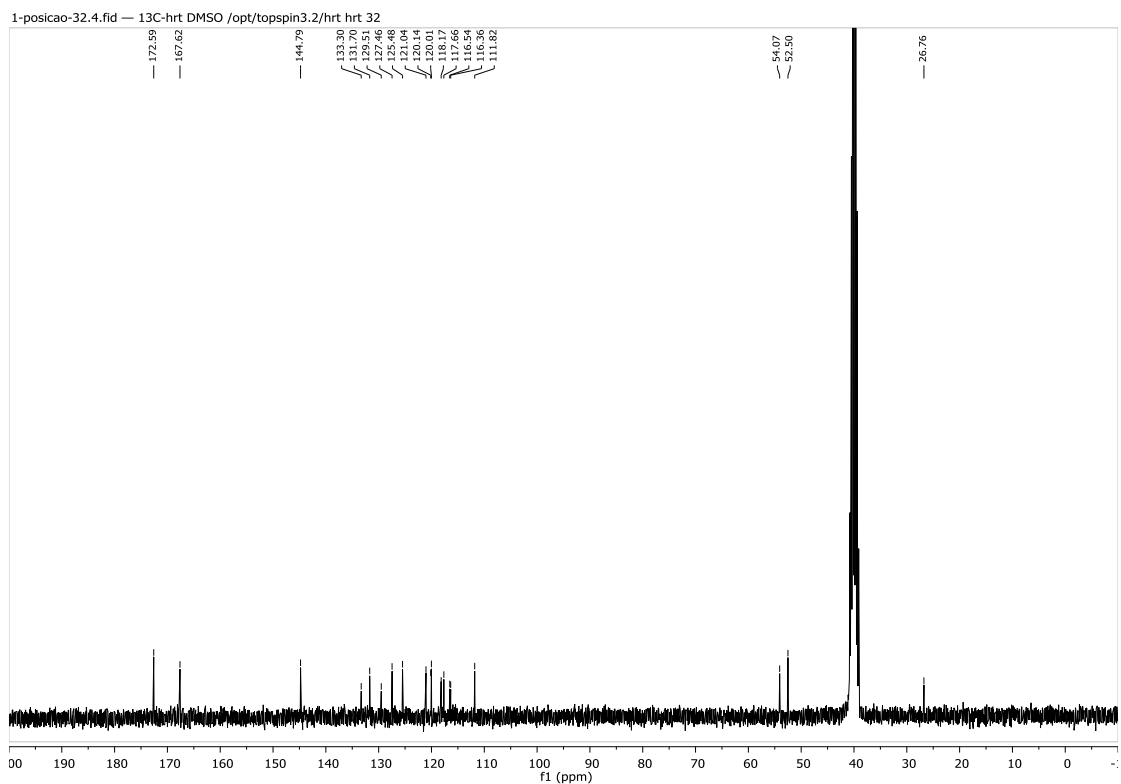

**Figure S16**  $^{13}\text{C}$  NMR (75 MHz,  $\text{DMSO-d}_6$ ) spectrum for (*S*)-2-(2-amino-3,5-dichlorobenzamido)-3-(7-chloro-1*H*-indol-3-yl)propanoate (**8e**).

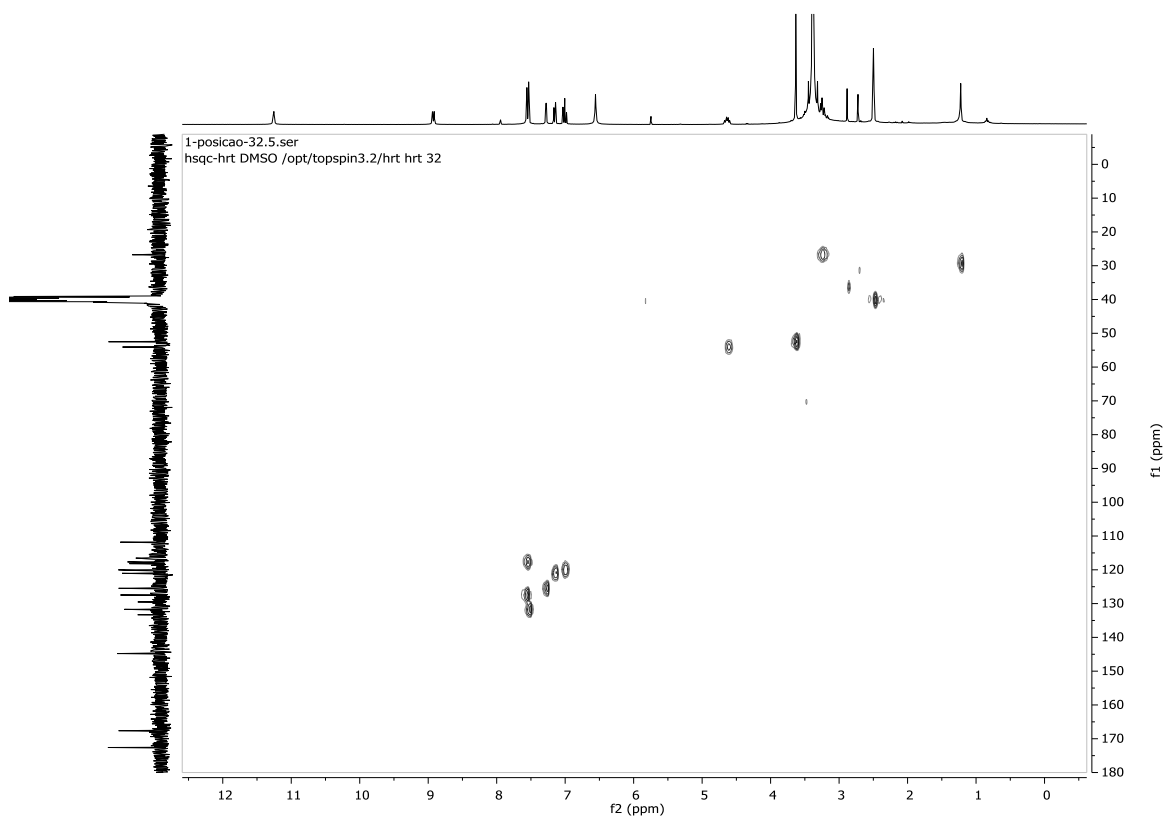

**Figure S17** HSQC spectrum for (*S*)-2-(2-amino-3,5-dichlorobenzamido)-3-(7-chloro-1*H*-indol-3-yl)propanoate (**8e**).

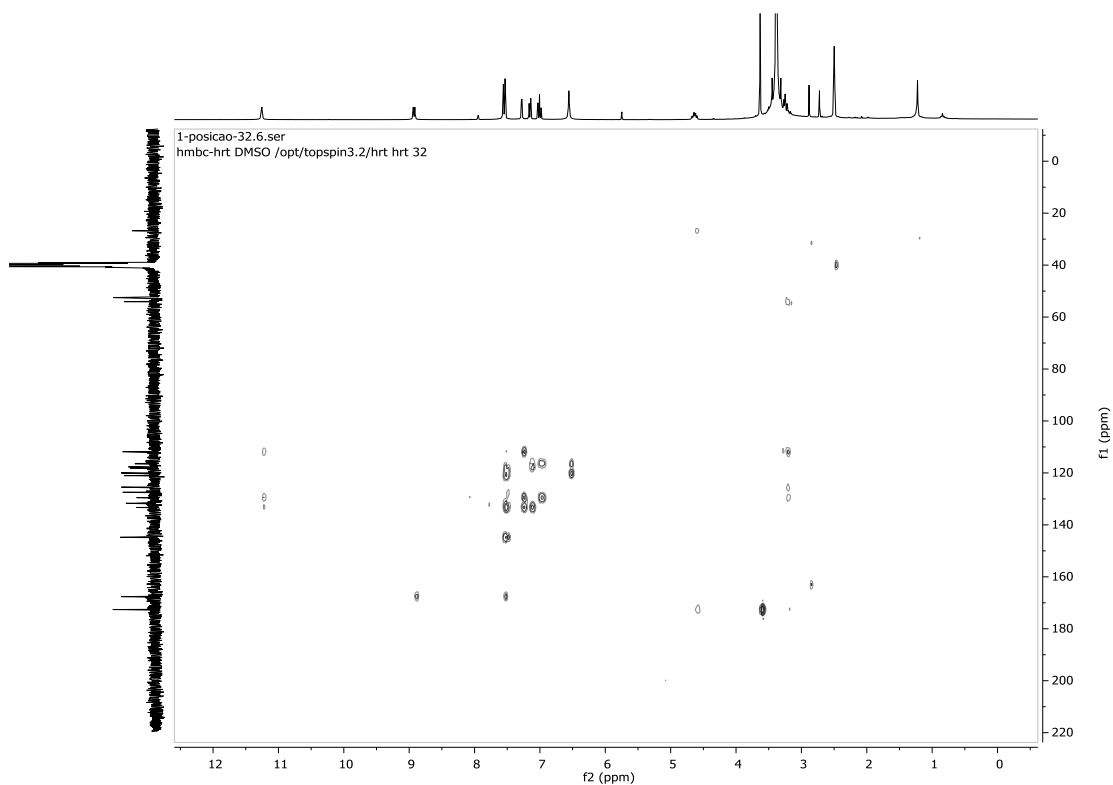

**Figure S18** HMBC spectrum for (*S*)-2-(2-amino-3,5-dichlorobenzamido)-3-(7-chloro-1*H*-indol-3-yl)propanoate (**8e**).

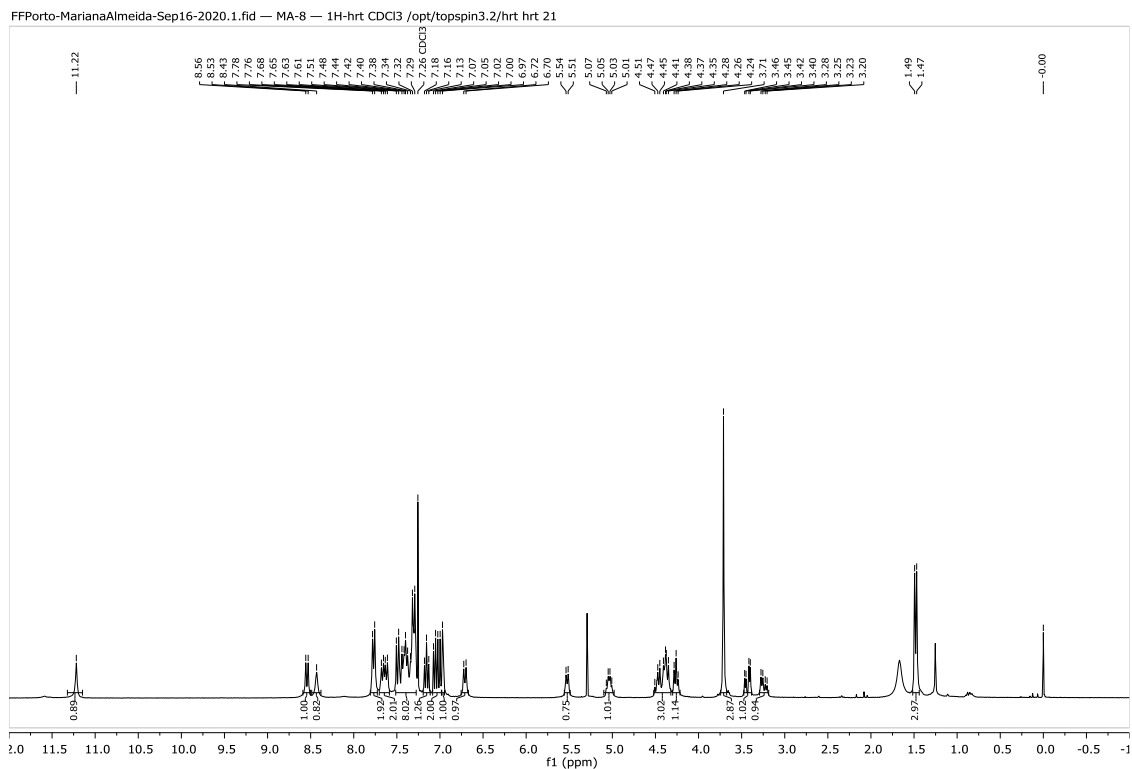

**Figure S19**  $^1\text{H}$ -NMR (300 MHz,  $\text{CDCl}_3$ ) spectrum of methyl (2-((*S*)-2-(((9*H*-fluoren-9-yl)methoxy)carbonyl)amino)propanamido)benzoyl)-*D*-tryptophanate (**11b**).

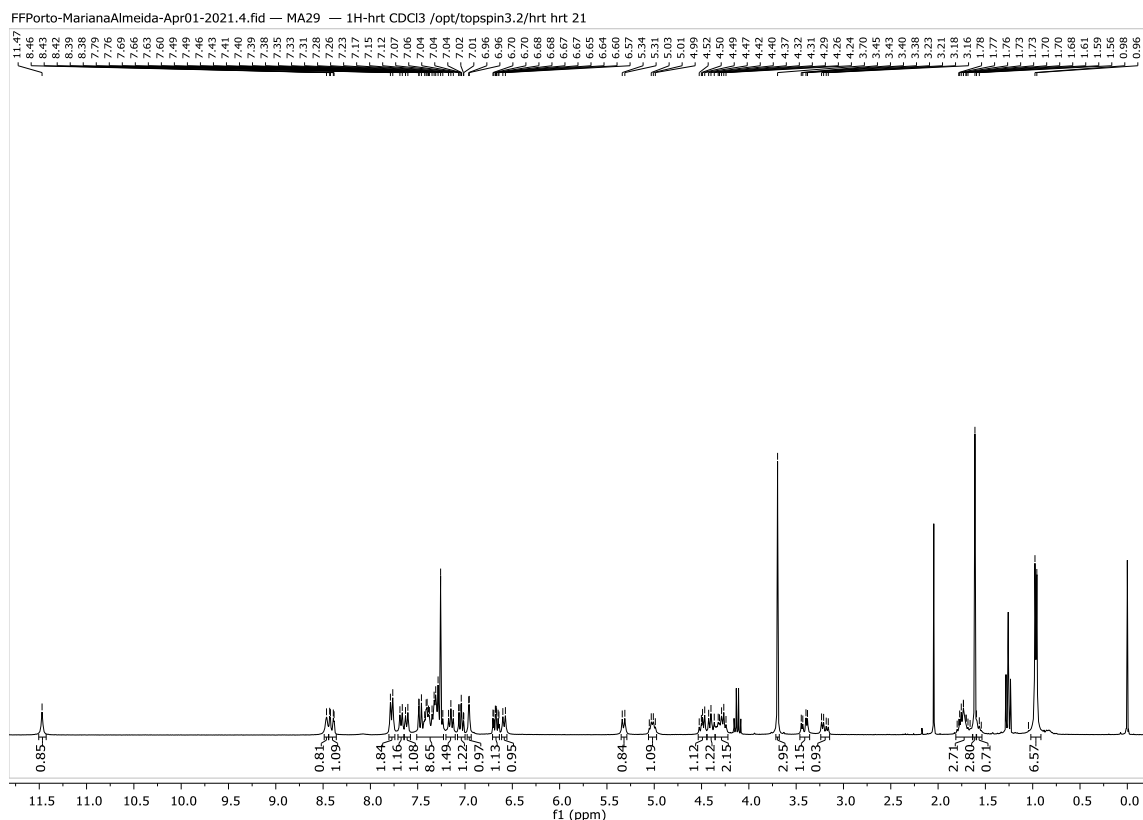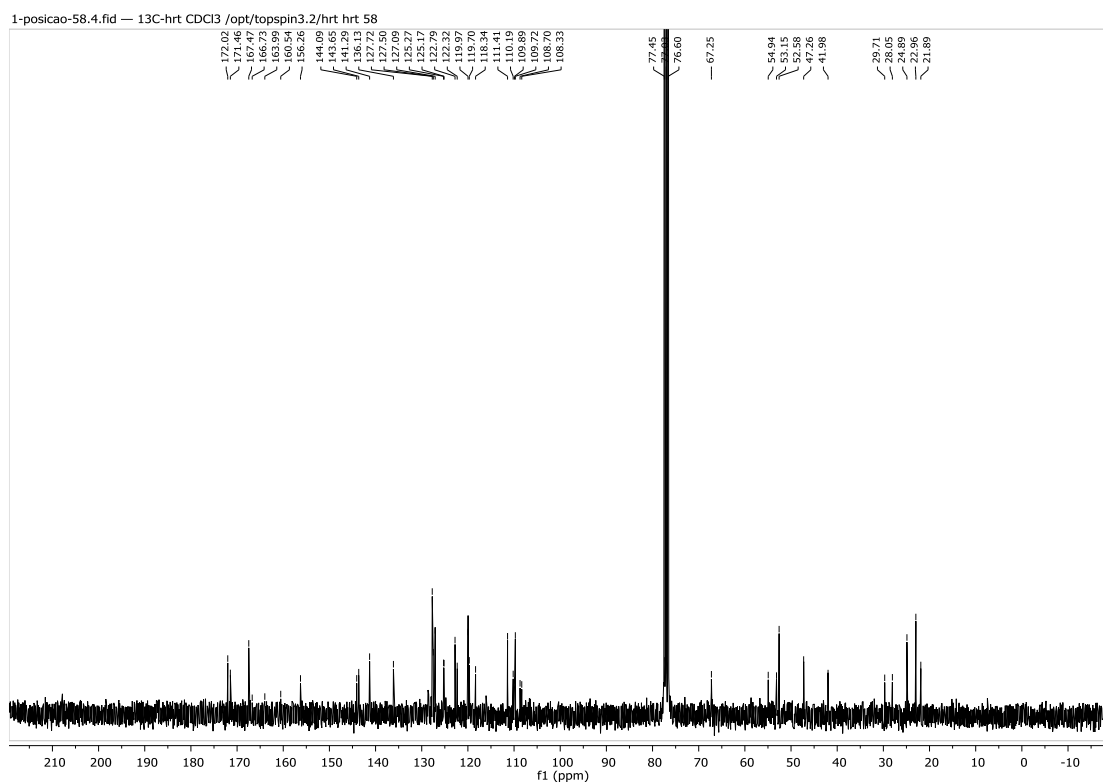

1-posicao-58.5.ser — hsqc-hrt CDCl3 /opt/topspin3.2/hrt hrt 58

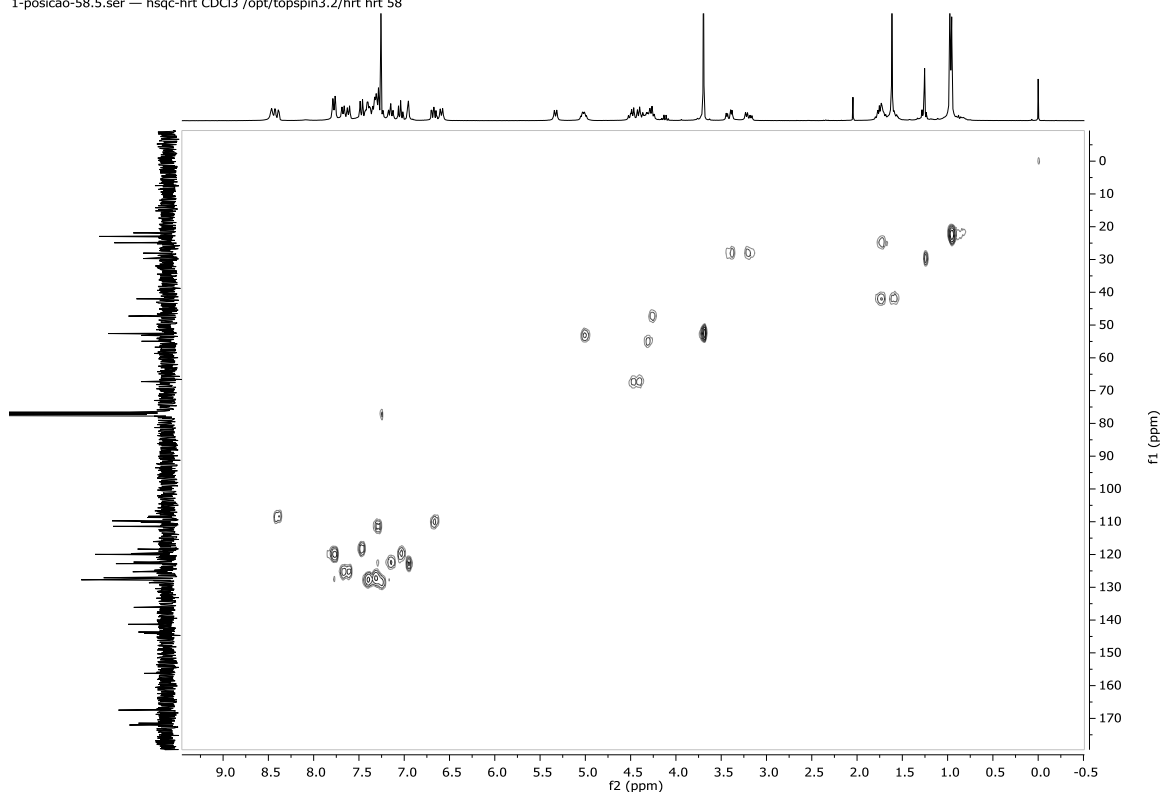

**Figure S22** HSQC spectrum for methyl (2-((*S*)-2-(((9*H*-fluoren-9-yl)methoxy)carbonyl)amino)-4-methylpentanamido)-4-fluorobenzoyl)-D-tryptophanate (**11c**).

1-posicao-58.6.ser — hmbc-hrt CDCl3 /opt/topspin3.2/hrt hrt 58

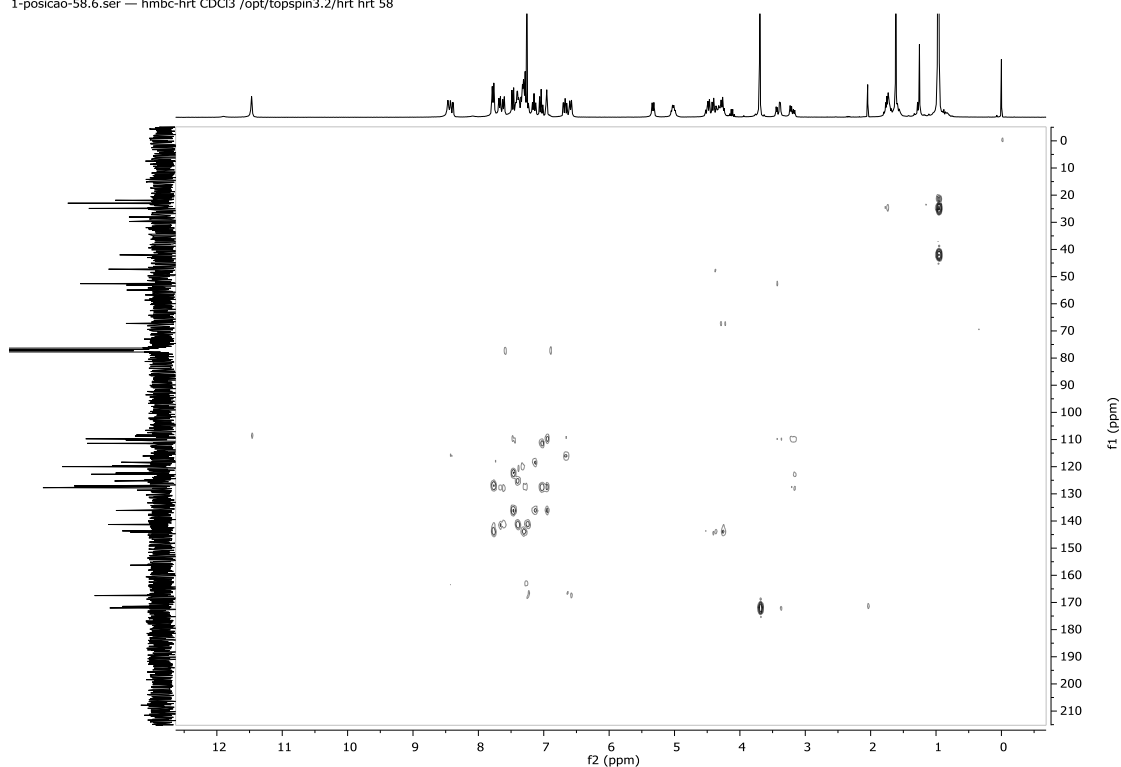

**Figure S23** HMBC spectrum for methyl (2-((*S*)-2-(((9*H*-fluoren-9-yl)methoxy)carbonyl)amino)-4-methylpentanamido)-4-fluorobenzoyl)-D-tryptophanate (**11c**).

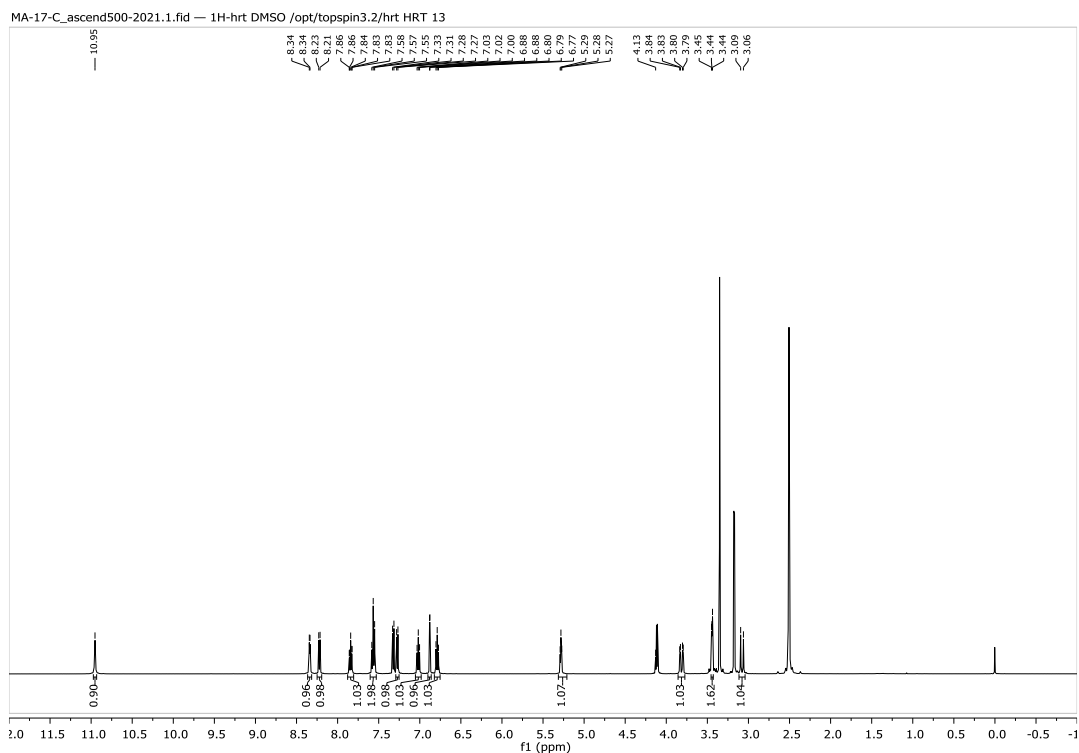

**Figure S24**  $^1\text{H}$  NMR (500 MHz,  $\text{DMSO-d}_6$ ) spectrum for (*R*)-4-((1*H*-indol-3-yl)methyl)-1,2-dihydro-6*H*-pyrazino[2,1-*b*]quinazoline-3,6(4*H*)-dione (**1**, **Gyantrypine**).

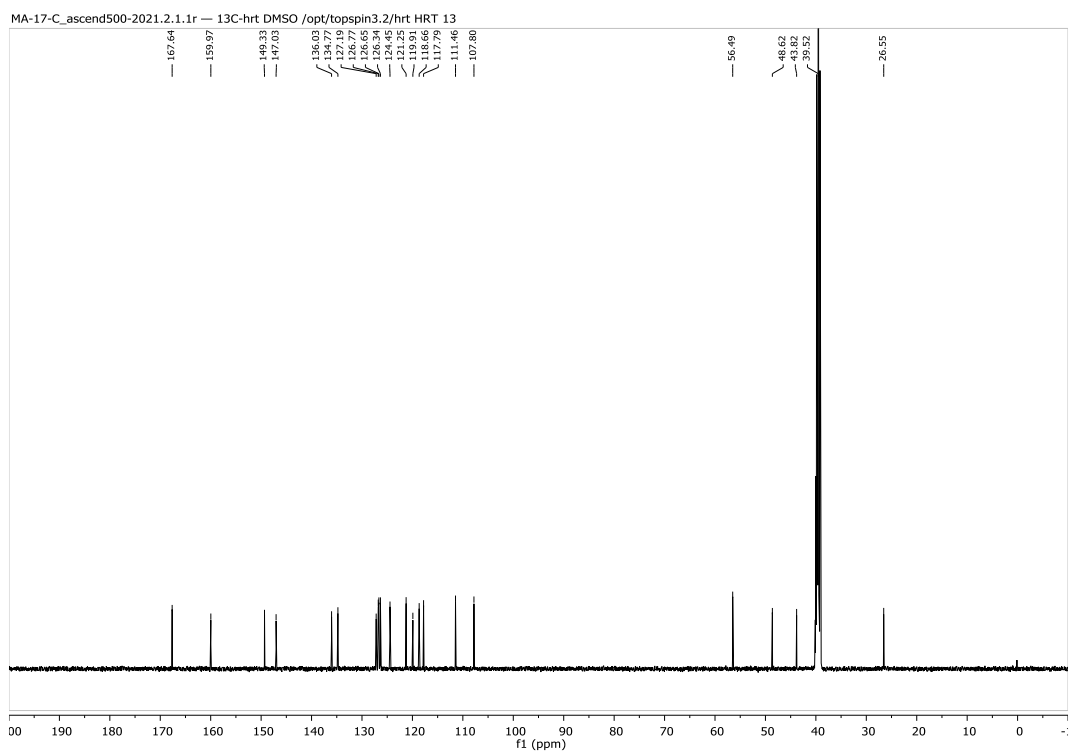

**Figure S25**  $^{13}\text{C}$  NMR (125 MHz,  $\text{DMSO-d}_6$ ) spectrum for (*R*)-4-((1*H*-indol-3-yl)methyl)-1,2-dihydro-6*H*-pyrazino[2,1-*b*]quinazoline-3,6(4*H*)-dione (**1**, **Gyantrypine**).

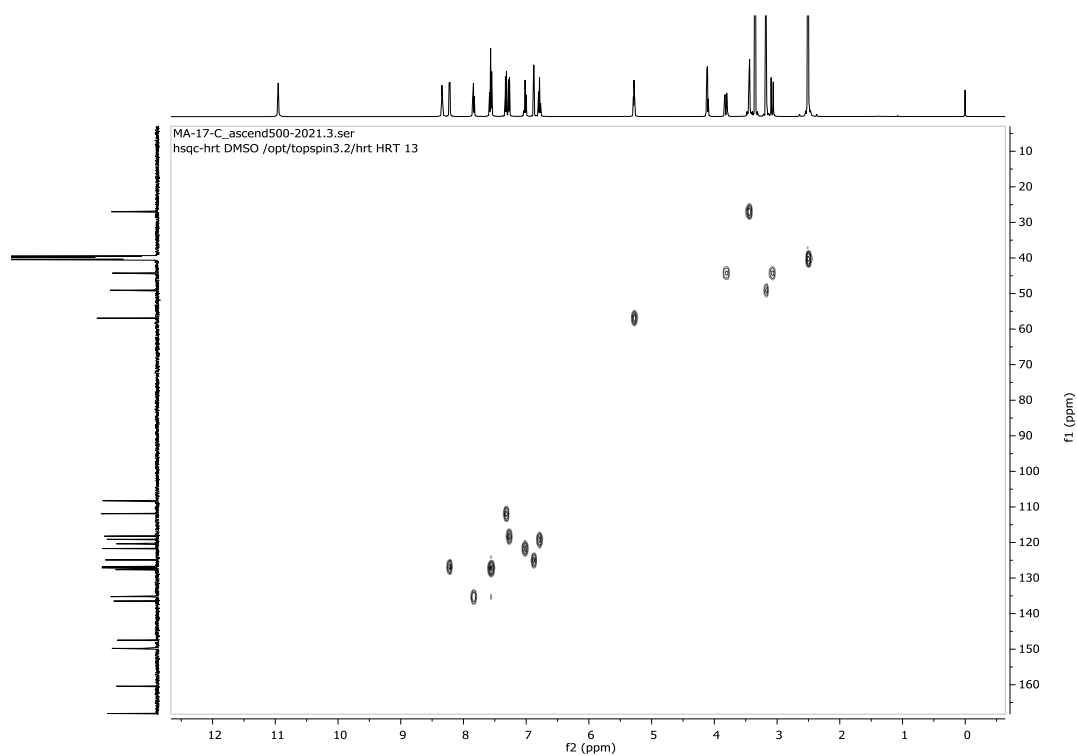

**Figure S26** HSQC spectrum for (*R*)-4-((1*H*-indol-3-yl)methyl)-1,2-dihydro-6*H*-pyrazino[2,1-*b*]quinazoline-3,6(4*H*)-dione (**1**, **Glyantrypine**).

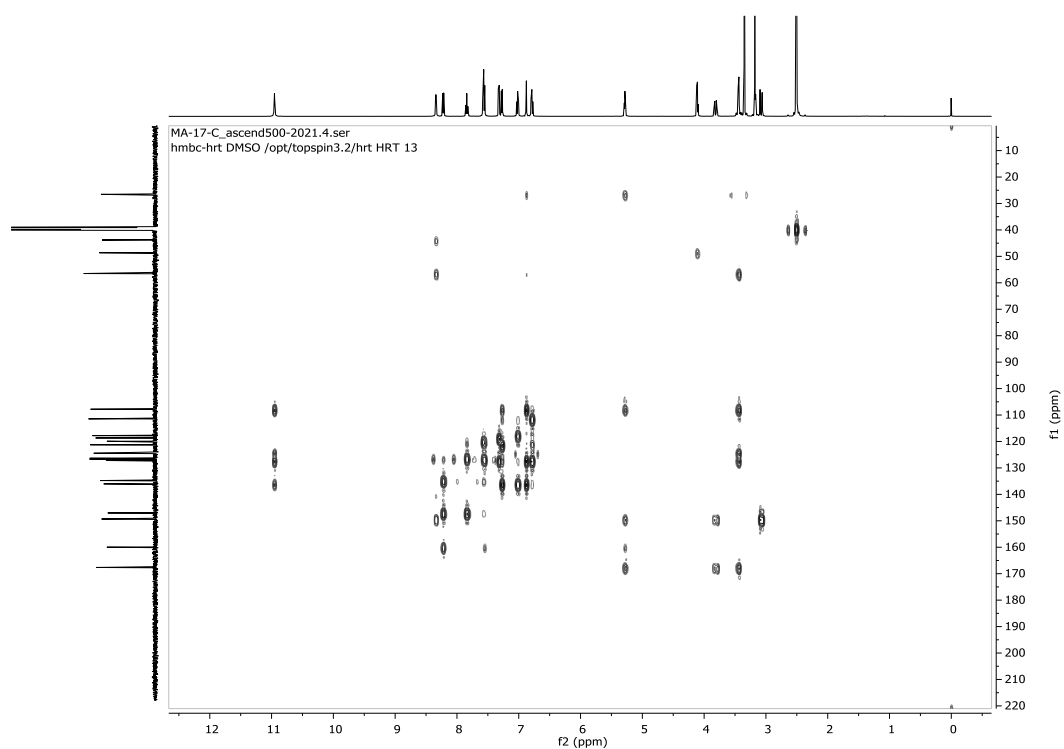

**Figure S27** HMBC spectrum for (*R*)-4-((1*H*-indol-3-yl)methyl)-1,2-dihydro-6*H*-pyrazino[2,1-*b*]quinazoline-3,6(4*H*)-dione (**1**, **Glyantrypine**).

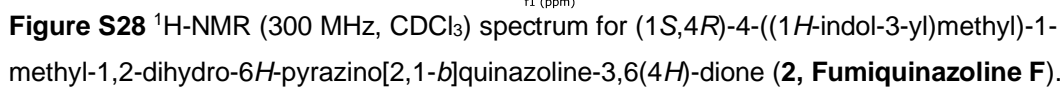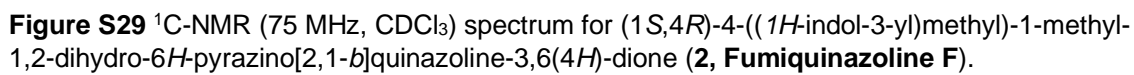



1-posicao-39.4.ser — hsqc-hrt CDCl3 /opt/topspin3.2/hrt hrt 39

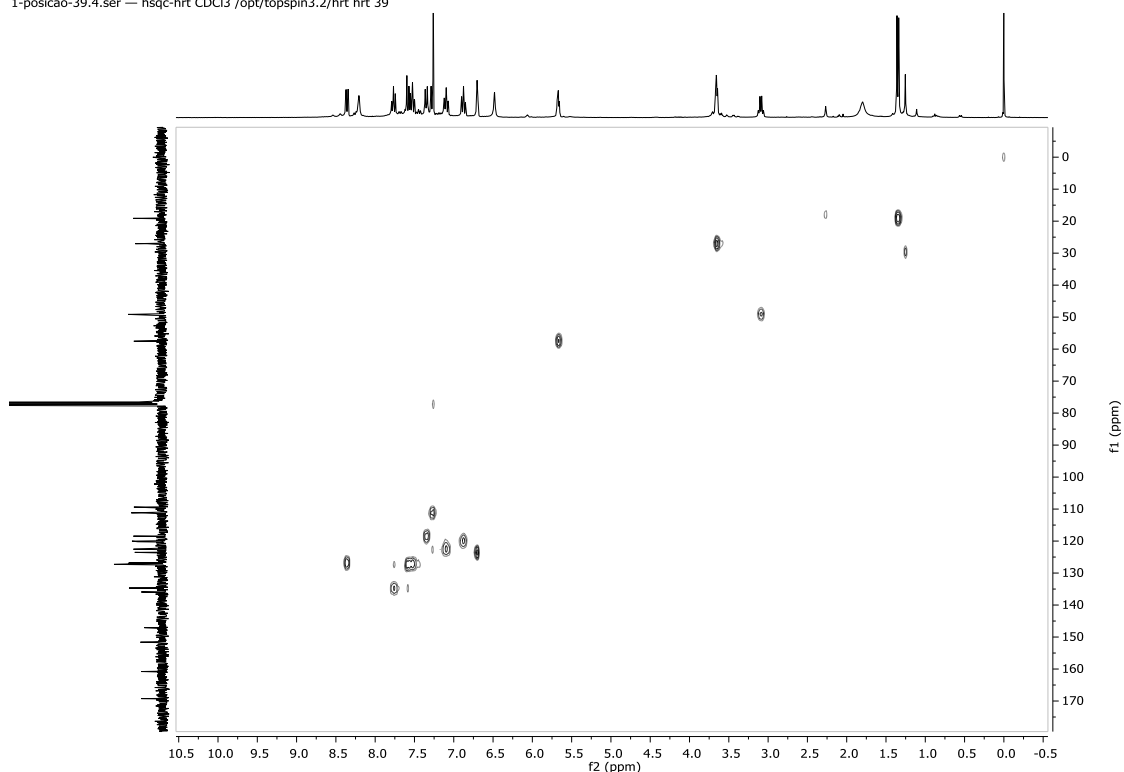

**Figure S30** HSQC spectrum for (1*S*,4*R*)-4-((1*H*-indol-3-yl)methyl)-1-methyl-1,2-dihydro-6*H*-pyrazino[2,1-*b*]quinazoline-3,6(4*H*)-dione (**2**, Fumiquinazoline F).

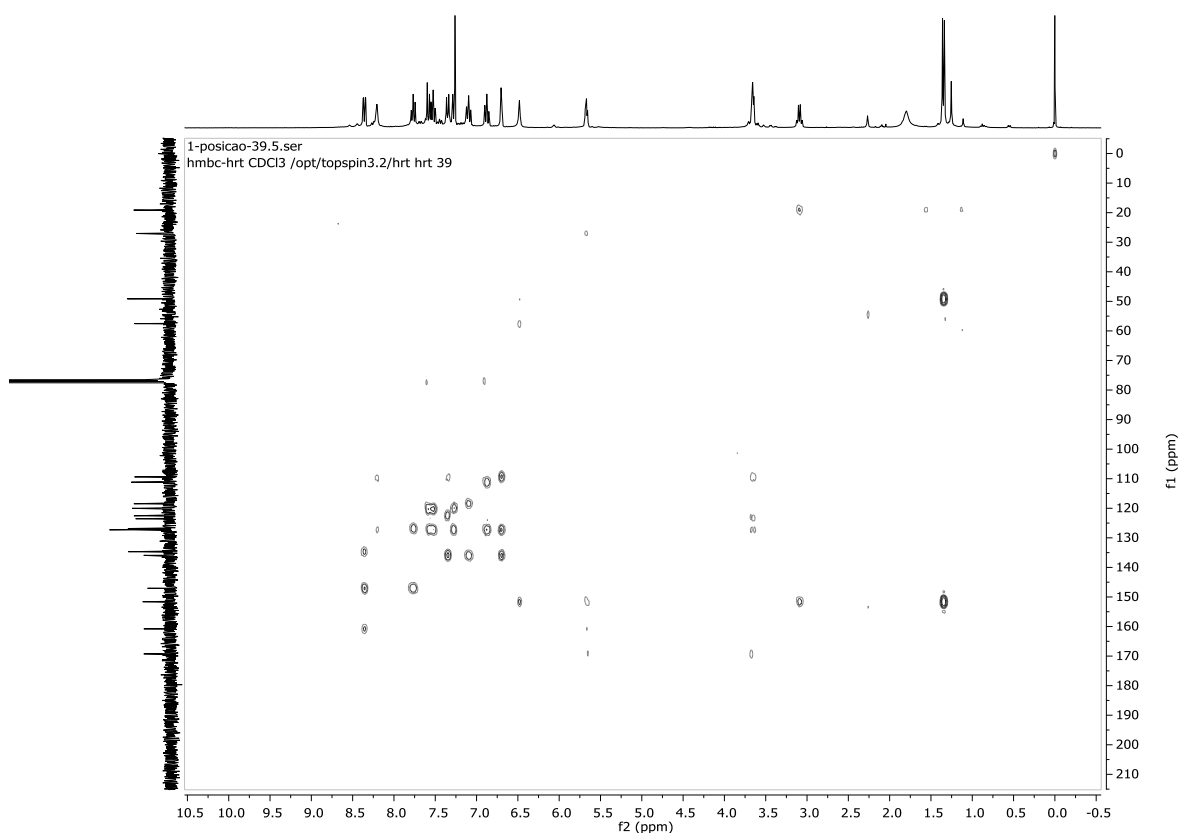

**Figure S31** HMBC spectrum for (1*S*,4*R*)-4-((1*H*-indol-3-yl)methyl)-1-methyl-1,2-dihydro-6*H*-pyrazino[2,1-*b*]quinazoline-3,6(4*H*)-dione (**2**, Fumiquinazoline F).

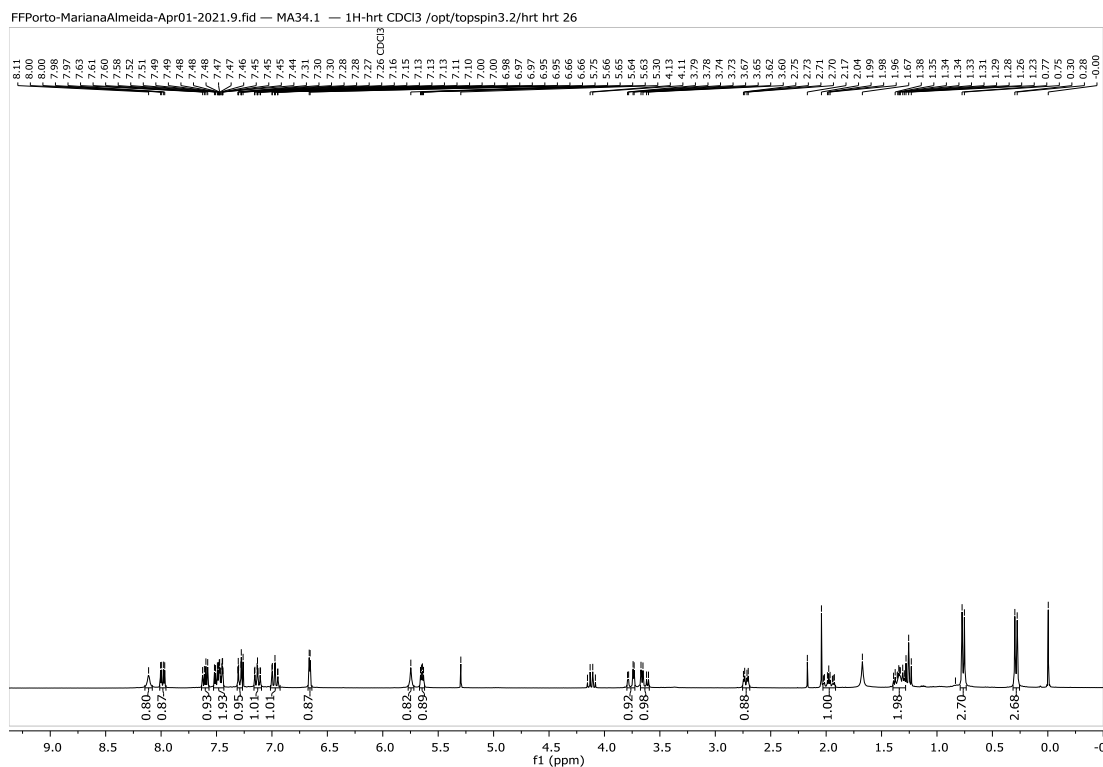

**Figure S32**  $^1\text{H}$  NMR (300 MHz,  $\text{CDCl}_3$ ) spectrum for (1*S*,4*R*)-4-((1*H*-indol-3-yl)methyl)-8-fluoro-1-isobutyl-1,2-dihydro-6*H*-pyrazino[2,1-*b*]quinazoline-3,6(4*H*)-dione (**12a**).

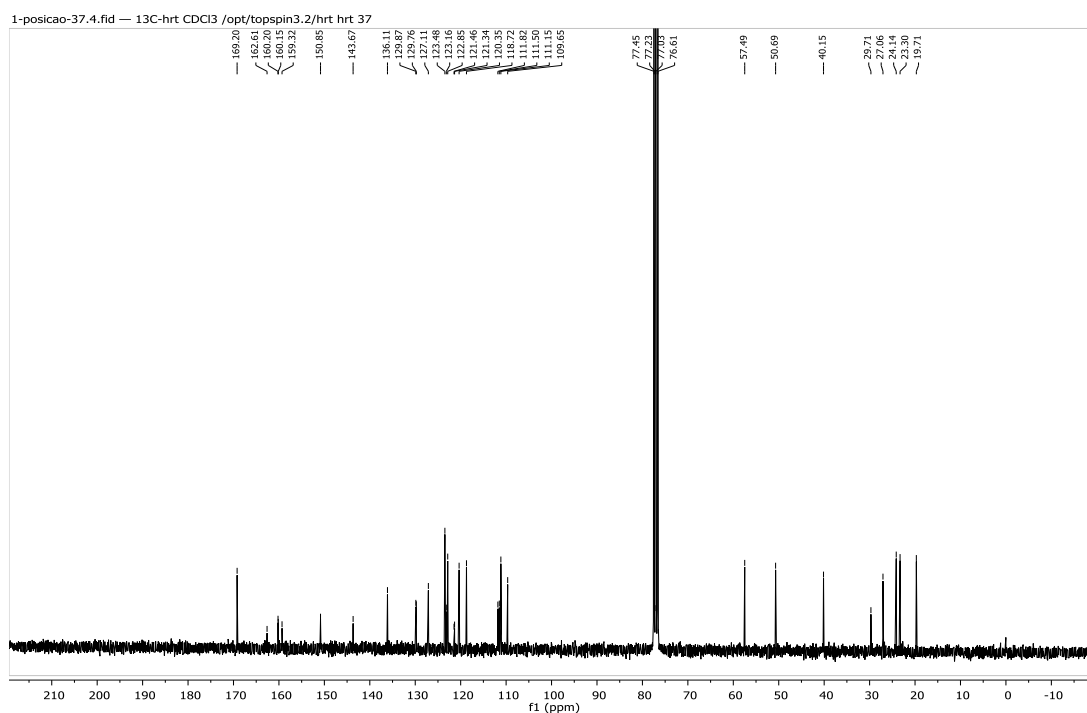

**Figure S33**  $^{13}\text{C}$  NMR (75 MHz,  $\text{CDCl}_3$ ) spectrum for (1*S*,4*R*)-4-((1*H*-indol-3-yl)methyl)-8-fluoro-1-isobutyl-1,2-dihydro-6*H*-pyrazino[2,1-*b*]quinazoline-3,6(4*H*)-dione (**12a**).

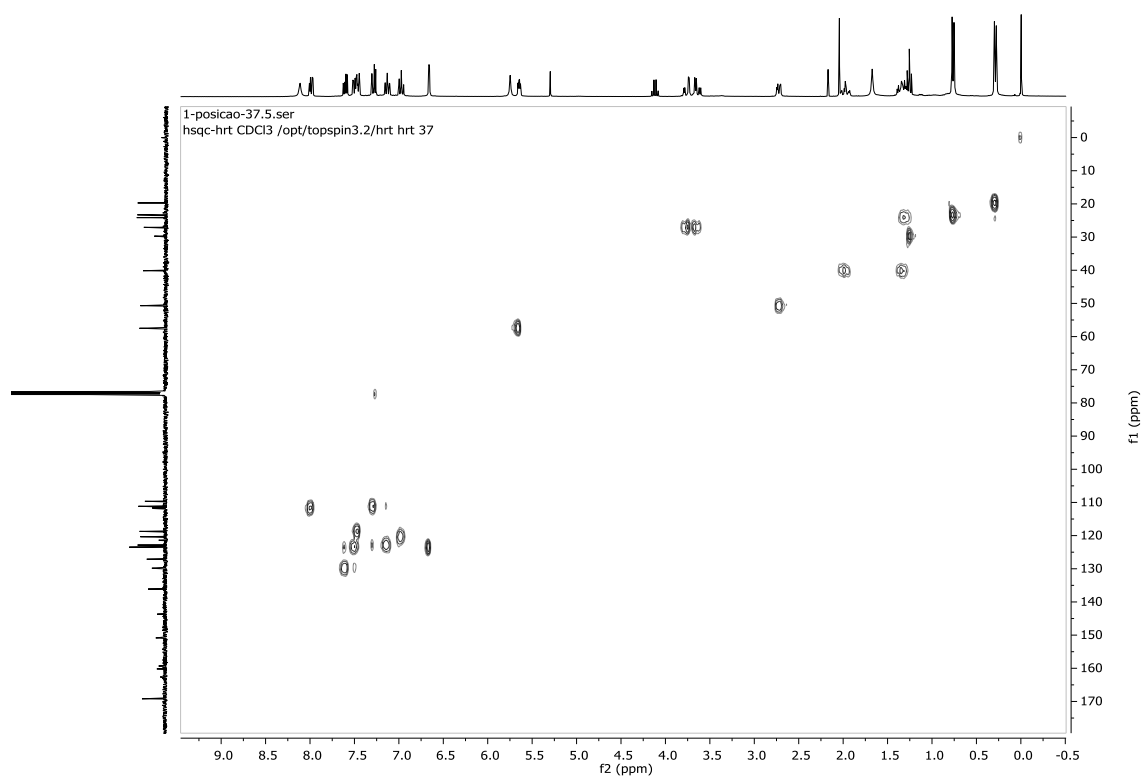

**Figure S34** HSQC spectrum for (1*S*,4*R*)-4-((1*H*-indol-3-yl)methyl)-8-fluoro-1-isobutyl-1,2-dihydro-6*H*-pyrazino[2,1-*b*]quinazoline-3,6(4*H*)-dione (**12a**).

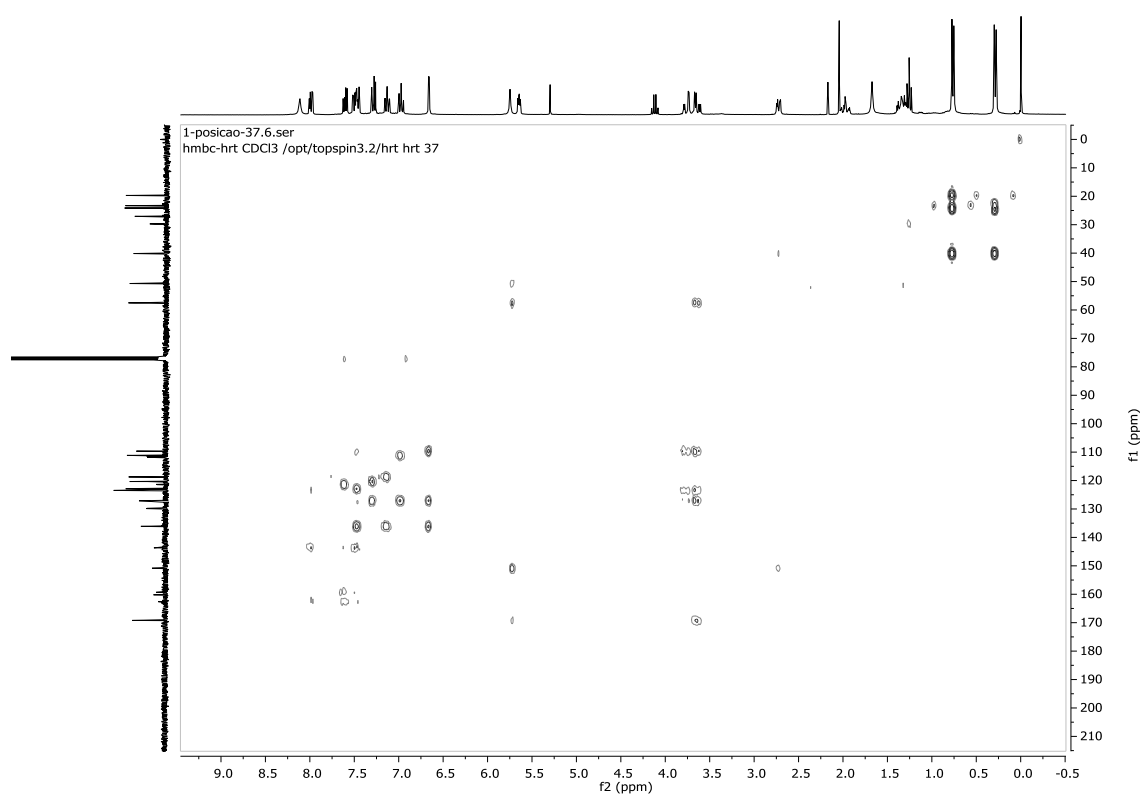

**Figure S35** HMBC spectrum for (1*S*,4*R*)-4-((1*H*-indol-3-yl)methyl)-8-fluoro-1-isobutyl-1,2-dihydro-6*H*-pyrazino[2,1-*b*]quinazoline-3,6(4*H*)-dione (**12a**).

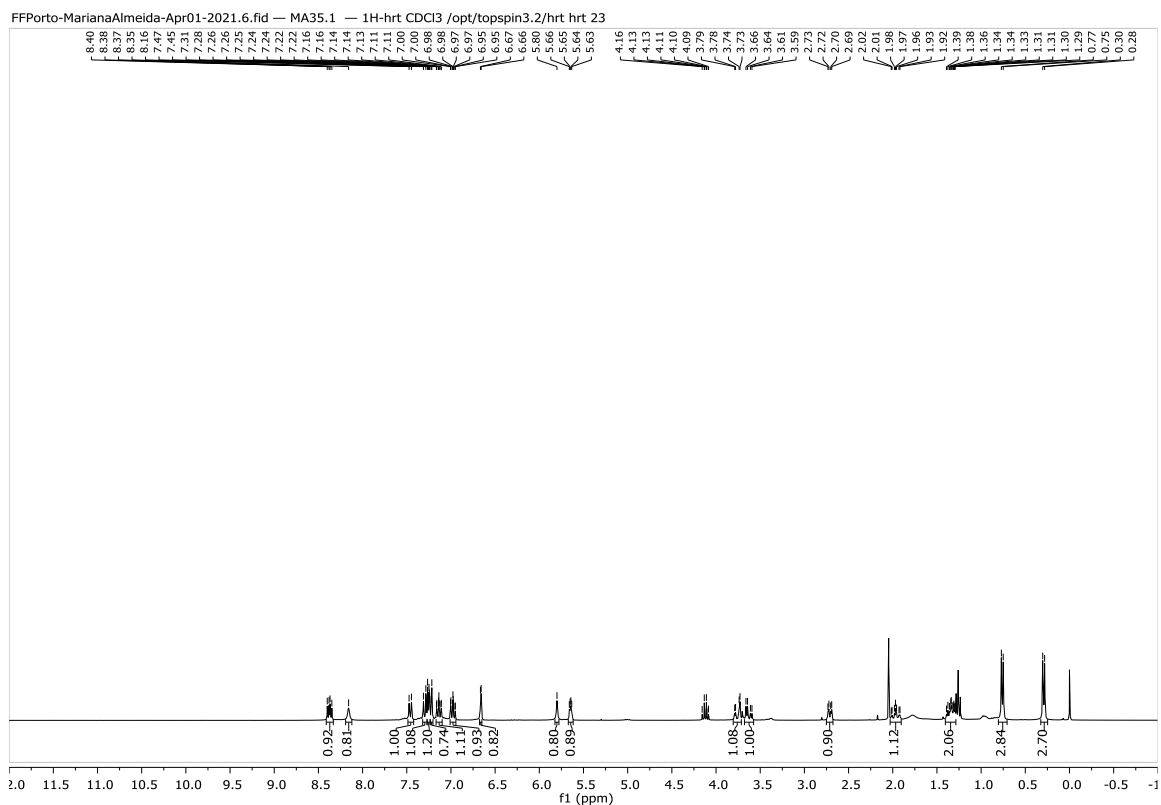

**Figure S36**  $^1\text{H}$  NMR (300 MHz,  $\text{CDCl}_3$ ) spectrum for (1*S*,4*R*)-4-((1*H*-indol-3-yl)methyl)-9-fluoro-1-isobutyl-1,2-dihydro-6*H*-pyrazino[2,1-*b*]quinazoline-3,6(4*H*)-dione (**12b**).

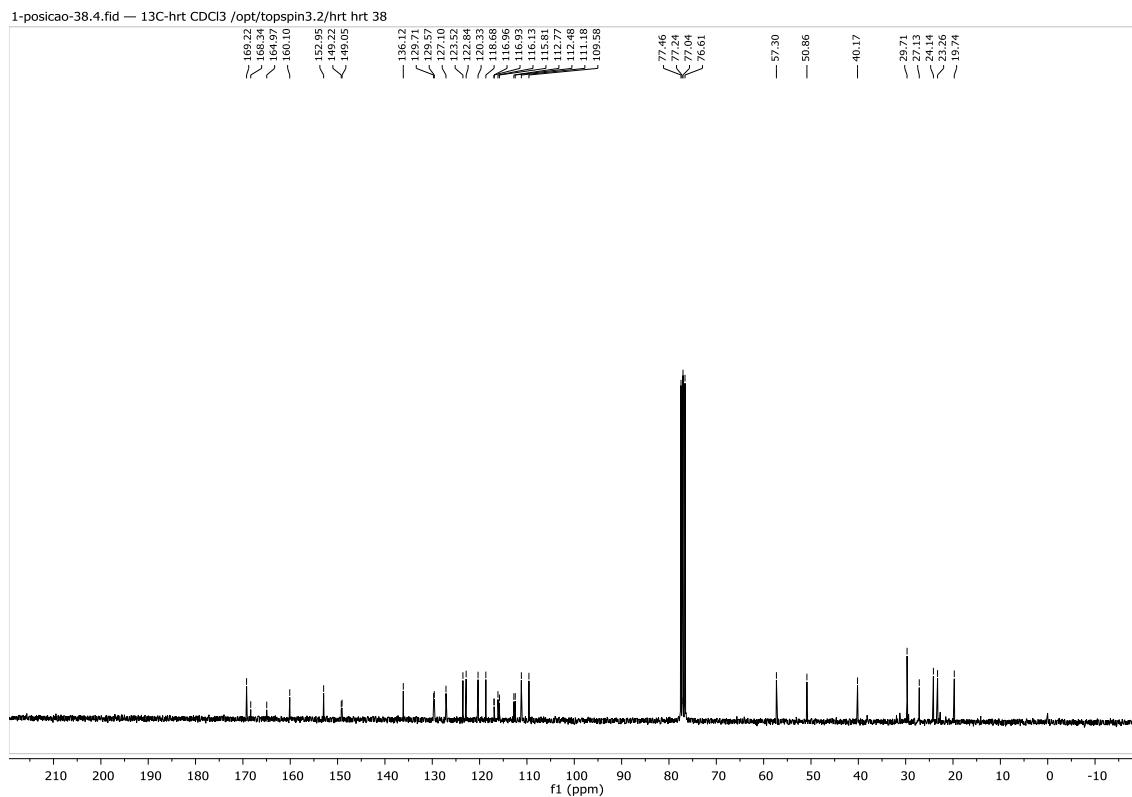

**Figure S37**  $^{13}\text{C}$  NMR (75 MHz,  $\text{CDCl}_3$ ) spectrum for (1*S*,4*R*)-4-((1*H*-indol-3-yl)methyl)-9-fluoro-1-isobutyl-1,2-dihydro-6*H*-pyrazino[2,1-*b*]quinazoline-3,6(4*H*)-dione (**12b**).

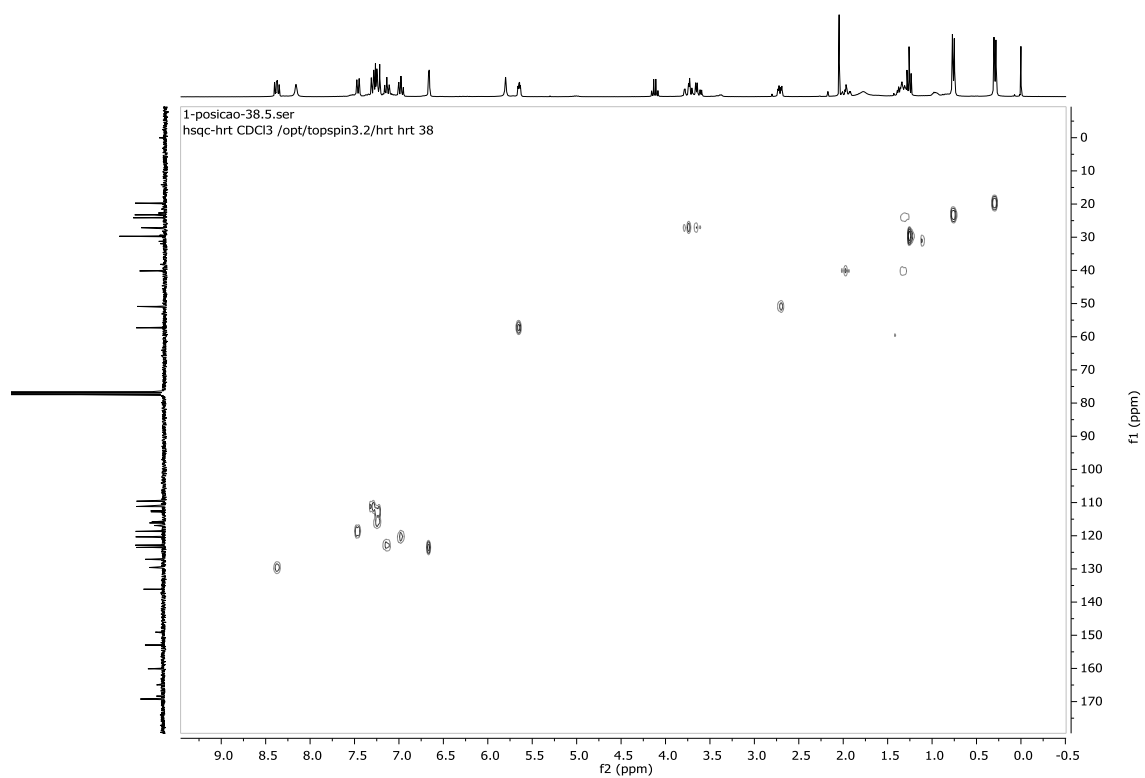

**Figure S38** HSQC spectrum for (1*S*,4*R*)-4-((1*H*-indol-3-yl)methyl)-9-fluoro-1-isobutyl-1,2-dihydro-6*H*-pyrazino[2,1-*b*]quinazoline-3,6(4*H*)-dione (**12b**).

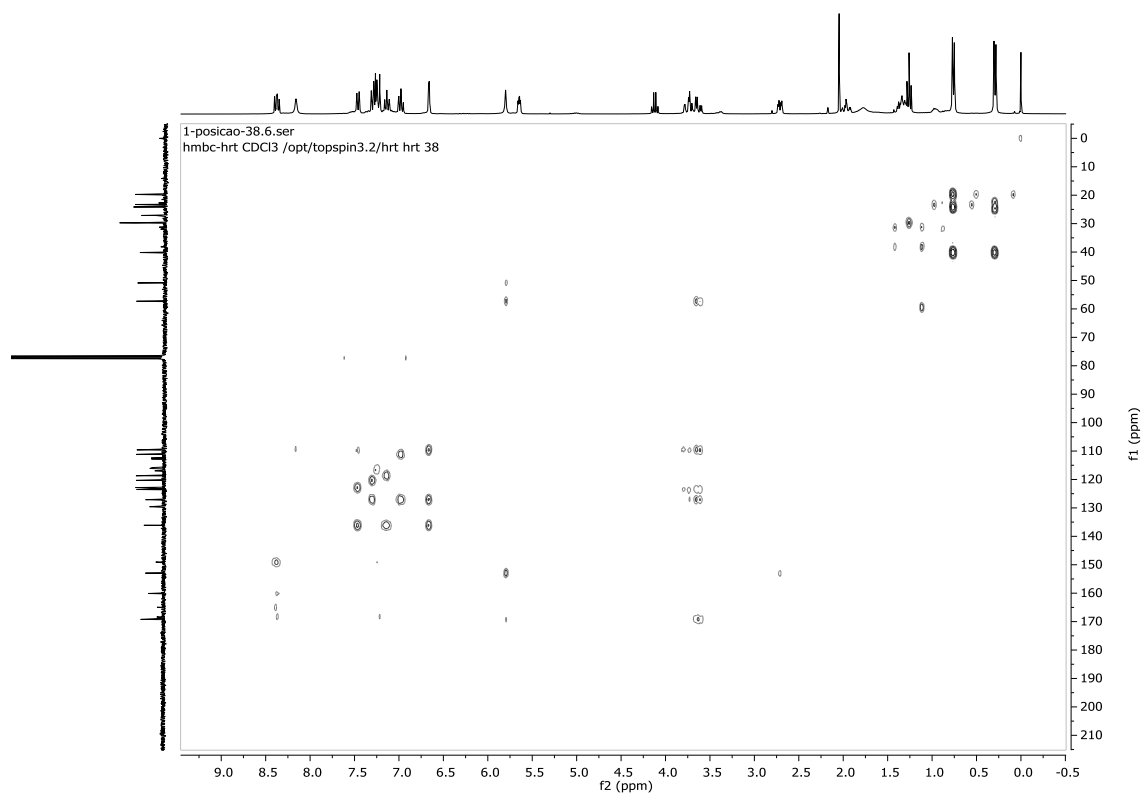

**Figure S39** HMBC spectrum for (1*S*,4*R*)-4-((1*H*-indol-3-yl)methyl)-9-fluoro-1-isobutyl-1,2-dihydro-6*H*-pyrazino[2,1-*b*]quinazoline-3,6(4*H*)-dione (**12b**).

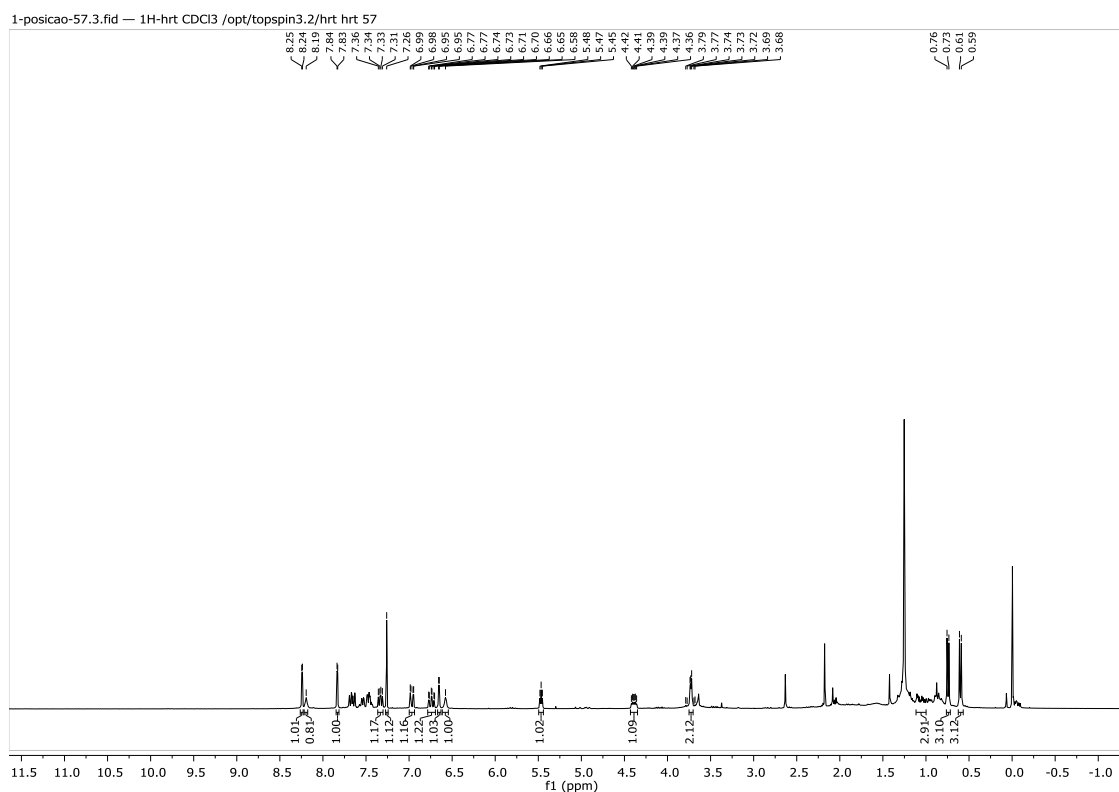

**Figure S40** <sup>1</sup>H-NMR (300 MHz, CDCl<sub>3</sub>) spectrum for (1*S*,4*S*)-8,10-dichloro-4-((6-fluoro-1*H*-indol-3-yl)methyl)-1-isobutyl-1,2-dihydro-6*H*-pyrazino[2,1-*b*]quinazoline-3,6(4*H*)-dione (**12c**).

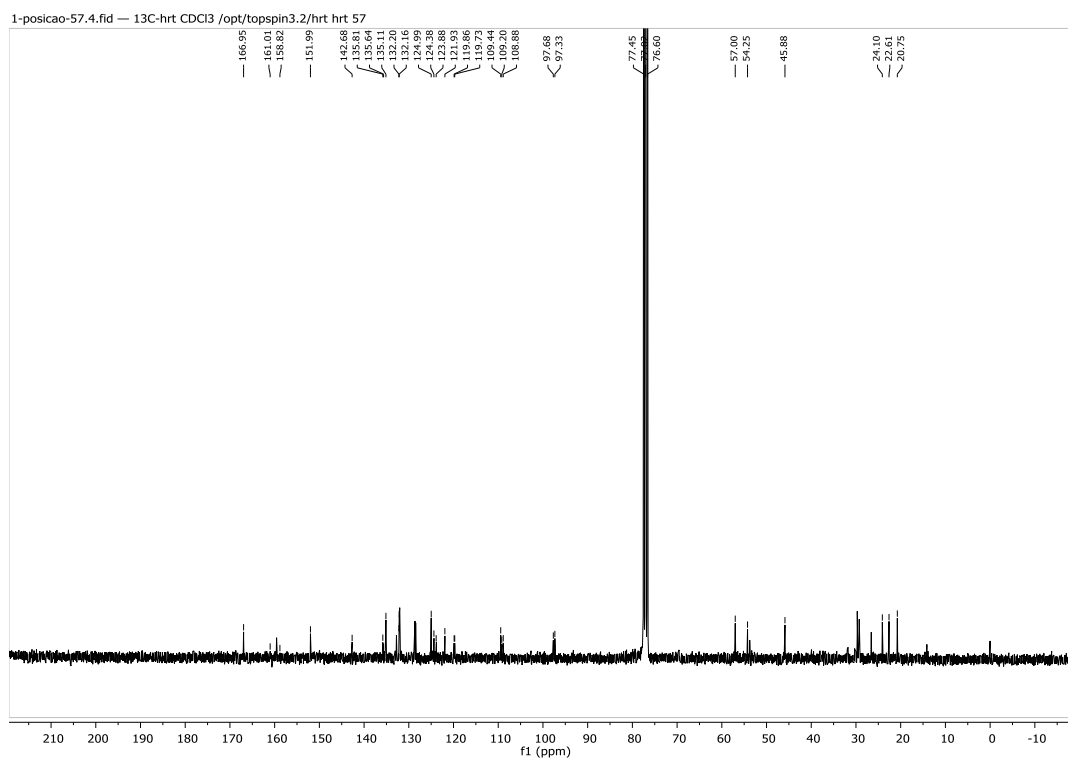

**Figure S41** <sup>13</sup>C-NMR (75 MHz, CDCl<sub>3</sub>) spectrum for (1*S*,4*S*)-8,10-dichloro-4-((6-fluoro-1*H*-indol-3-yl)methyl)-1-isobutyl-1,2-dihydro-6*H*-pyrazino[2,1-*b*]quinazoline-3,6(4*H*)-dione (**12c**).

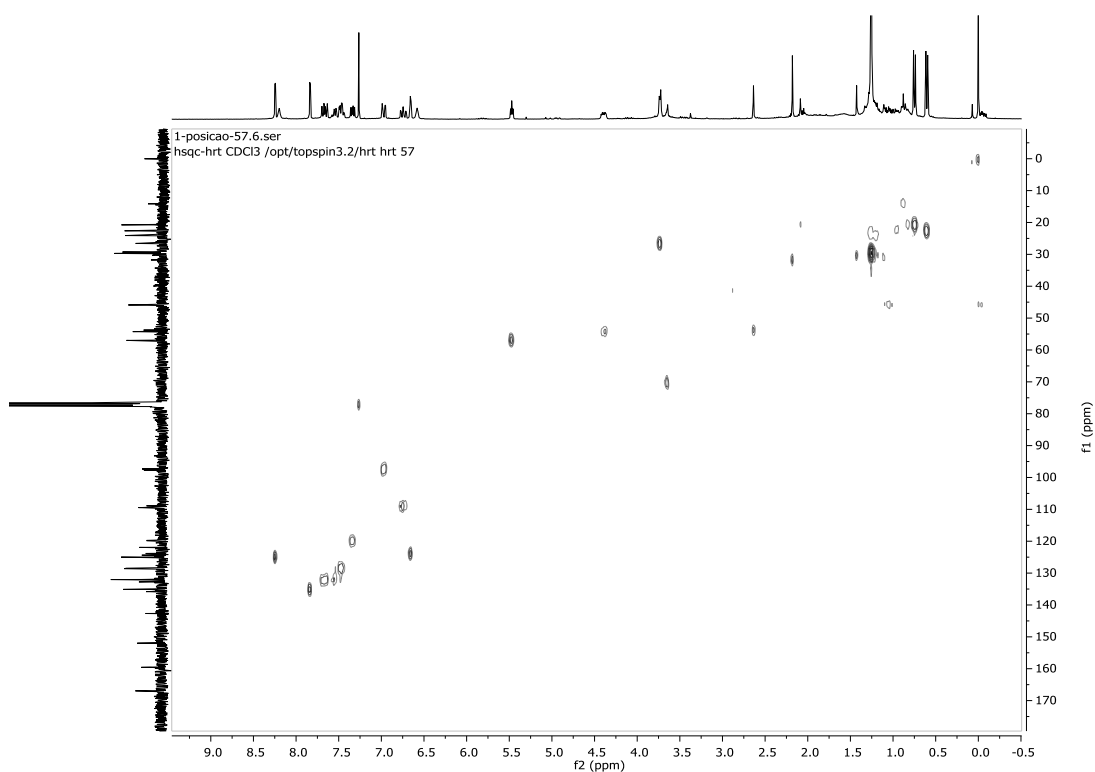

**Figure S42** HSQC spectrum for (1*S*,4*S*)-8,10-dichloro-4-((6-fluoro-1*H*-indol-3-yl)methyl)-1-isobutyl-1,2-dihydro-6*H*-pyrazino[2,1-*b*]quinazoline-3,6(4*H*)-dione (**12c**).

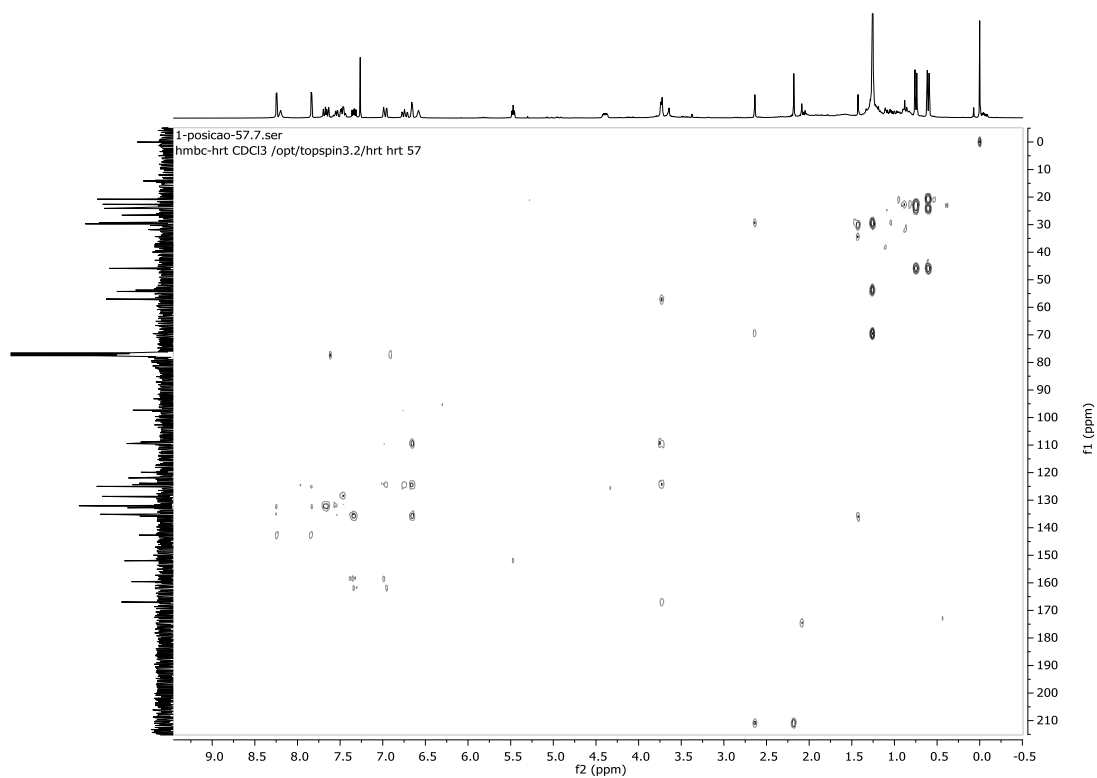

**Figure S43** HMBC spectrum for (1*S*,4*S*)-8,10-dichloro-4-((6-fluoro-1*H*-indol-3-yl)methyl)-1-isobutyl-1,2-dihydro-6*H*-pyrazino[2,1-*b*]quinazoline-3,6(4*H*)-dione (**12c**).

MA-44-1\_ascend500-2021.1.fid — 1H-hrt CDCl<sub>3</sub> /opt/topspin3.2/hrt HRT 16

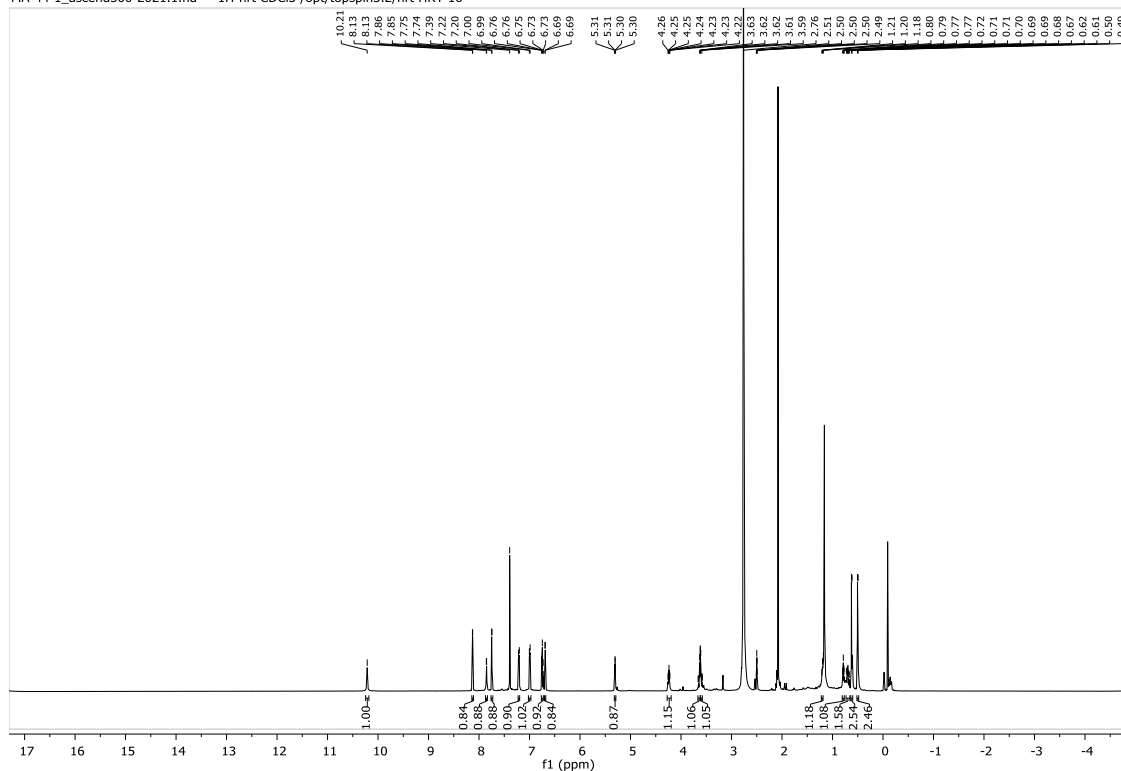

**Figure S44** <sup>1</sup>H-NMR (500 MHz, CDCl<sub>3</sub>) spectrum for (1*S*,4*S*)-8,10-dichloro-4-((7-chloro-1*H*-indol-3-yl)methyl)-1-isobutyl-1,2-dihydro-6*H*-pyrazino[2,1-*b*]quinazoline-3,6(4*H*)-dione (**12d**).

MA-44-1\_ascend500-2021.2.1.1r — 13C-2h-pp-hrt CDCl<sub>3</sub> /opt/topspin3.2/hrt HRT 16

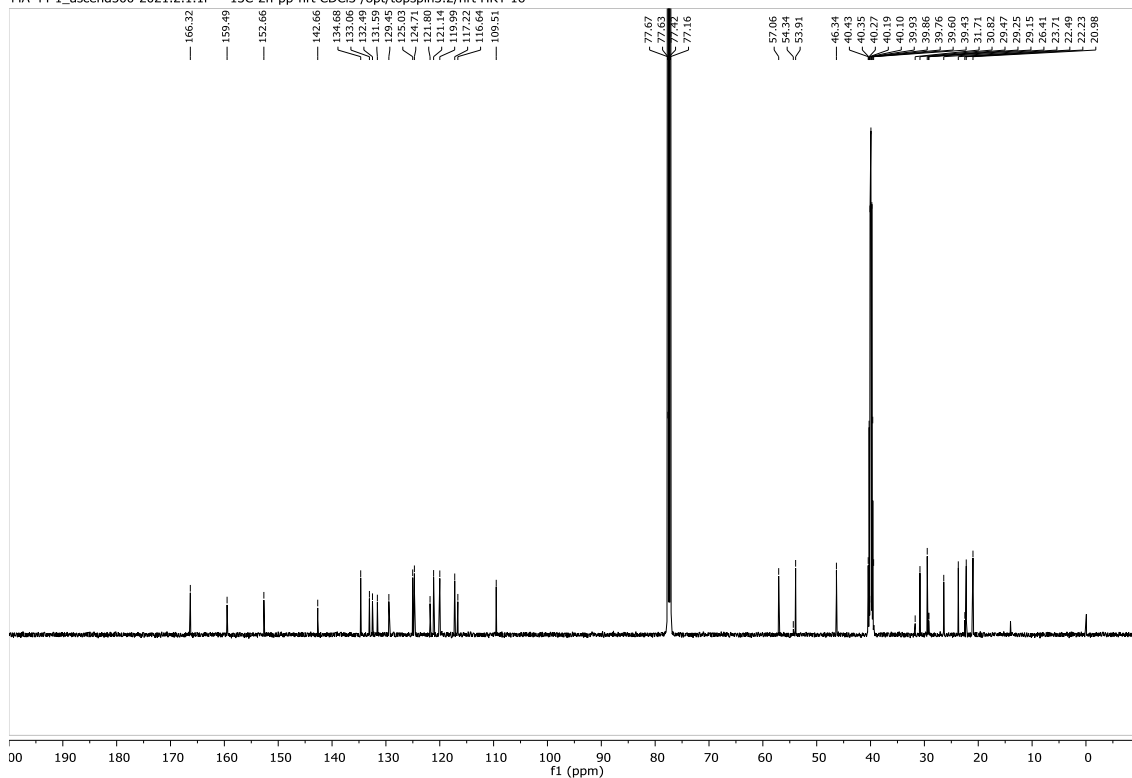

**Figure S45** <sup>13</sup>C-NMR (125 MHz, CDCl<sub>3</sub>) spectrum for (1*S*,4*S*)-8,10-dichloro-4-((7-chloro-1*H*-indol-3-yl)methyl)-1-isobutyl-1,2-dihydro-6*H*-pyrazino[2,1-*b*]quinazoline-3,6(4*H*)-dione (**12d**).



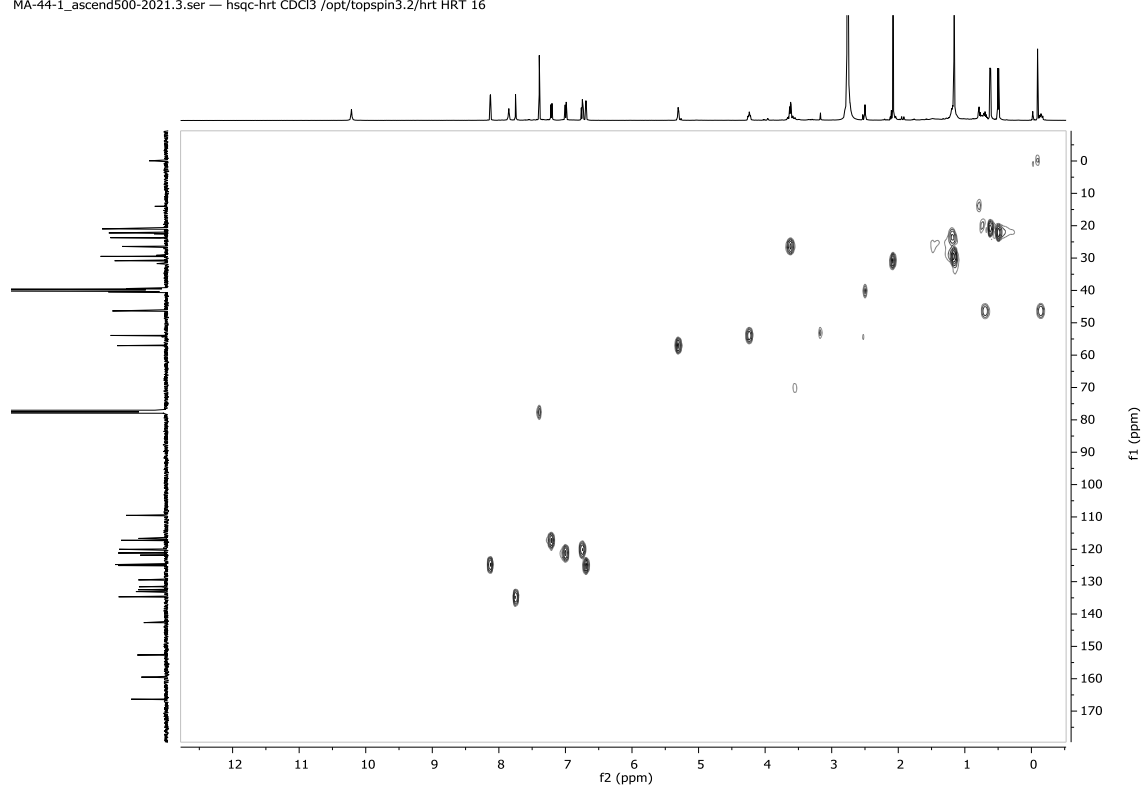

**Figure S46** HSQC spectrum for (1*S*,4*S*)-8,10-dichloro-4-((7-chloro-1*H*-indol-3-yl)methyl)-1-isobutyl-1,2-dihydro-6*H*-pyrazino[2,1-*b*]quinazoline-3,6(4*H*)-dione (**12d**).

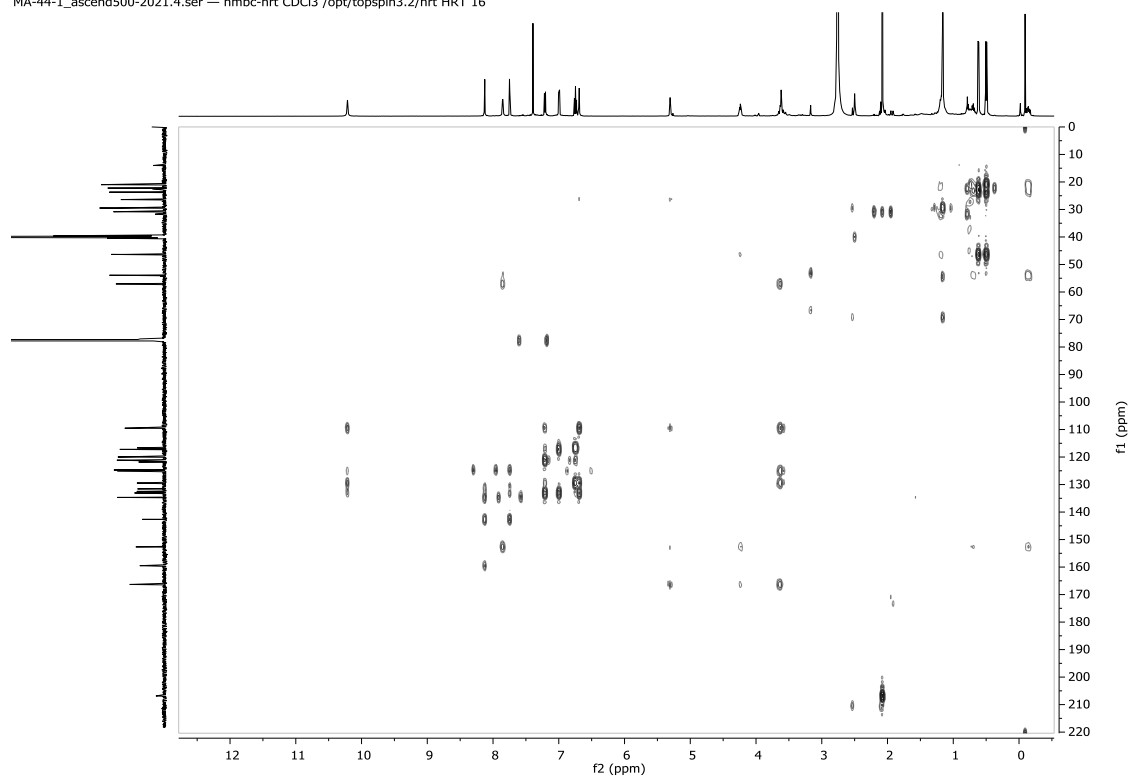

**Figure S47** HMBC spectrum for (1*S*,4*S*)-8,10-dichloro-4-((7-chloro-1*H*-indol-3-yl)methyl)-1-isobutyl-1,2-dihydro-6*H*-pyrazino[2,1-*b*]quinazoline-3,6(4*H*)-dione (**12d**).

## 2. HRMS Data

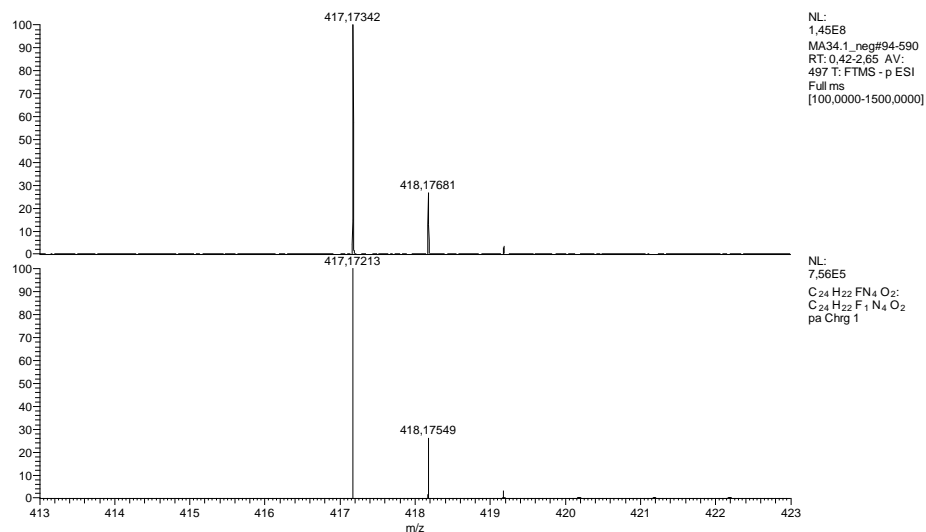

Elemental composition search on mass 417,17

m/z = 412,17-422,17

| m/z       | Theo. Mass | Delta (ppm) | RDB equiv. | Composition                                                     |
|-----------|------------|-------------|------------|-----------------------------------------------------------------|
| 417,17342 | 417,17213  | 3,09        | 15,5       | C <sub>24</sub> H <sub>22</sub> O <sub>2</sub> N <sub>4</sub> F |

**Figure S48.** HRMS data of (1*S*,4*R*)-4-((1*H*-indol-3-yl)methyl)-8-fluoro-1-isobutyl-1,2-dihydro-6*H*-pyrazino[2,1-*b*]quinazoline-3,6(4*H*)-dione (**12a**).

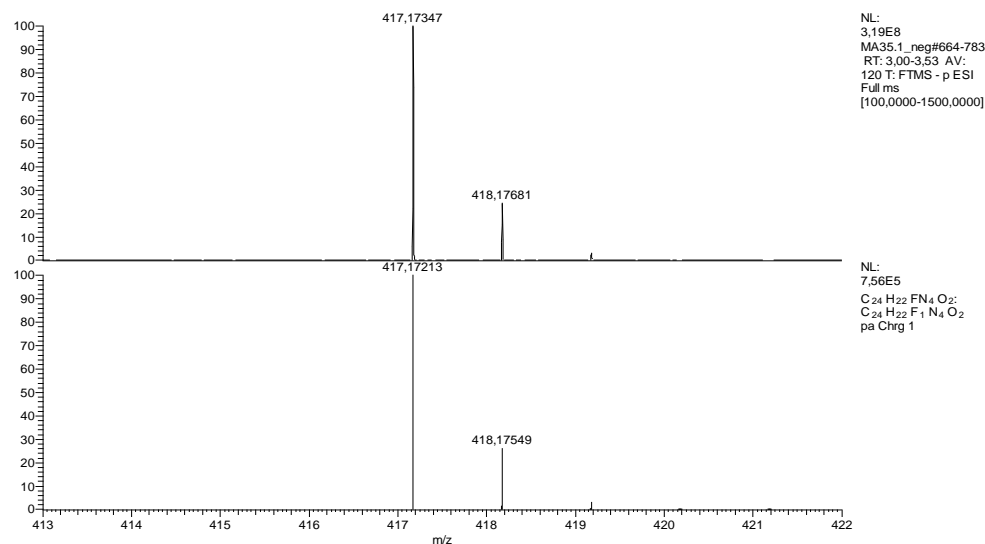

Elemental composition search on mass 417,17

m/z = 412,17-422,17

| m/z       | Theo. Mass | Delta (ppm) | RDB equiv. | Composition                                                     |
|-----------|------------|-------------|------------|-----------------------------------------------------------------|
| 417,17347 | 417,17213  | 3,21        | 15,5       | C <sub>24</sub> H <sub>22</sub> O <sub>2</sub> N <sub>4</sub> F |

**Figure S49.** HRMS data of (1*S*,4*R*)-4-((1*H*-indol-3-yl)methyl)-9-fluoro-1-isobutyl-1,2-dihydro-6*H*-pyrazino[2,1-*b*]quinazoline-3,6(4*H*)-dione (**12b**).

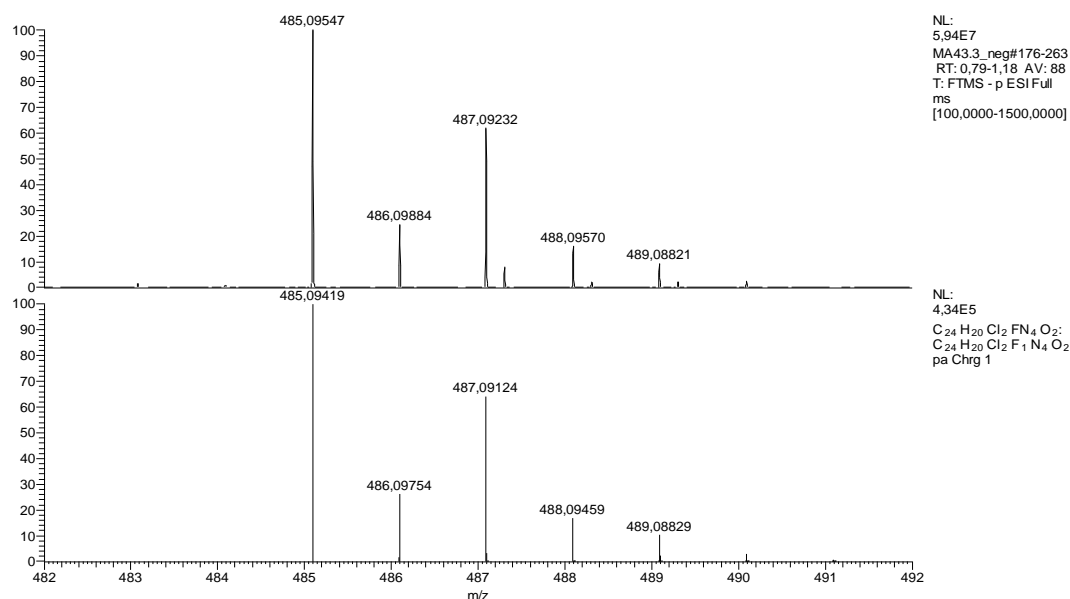

Elemental composition search on mass 485,10

m/z = 480,10-490,10

| m/z       | Theo. Mass | Delta (ppm) | RDB equiv. | Composition                                                                     |
|-----------|------------|-------------|------------|---------------------------------------------------------------------------------|
| 485,09547 | 485,09419  | 2,65        | 15,5       | C <sub>24</sub> H <sub>20</sub> O <sub>2</sub> N <sub>4</sub> Cl <sub>2</sub> F |

**Figure S50.** HRMS data of (1*S*,4*S*)-8,10-dichloro-4-((6-fluoro-1*H*-indol-3-yl)methyl)-1-isobutyl-1,2-dihydro-6*H*-pyrazino[2,1-*b*]quinazoline-3,6(4*H*)-dione (**12c**).

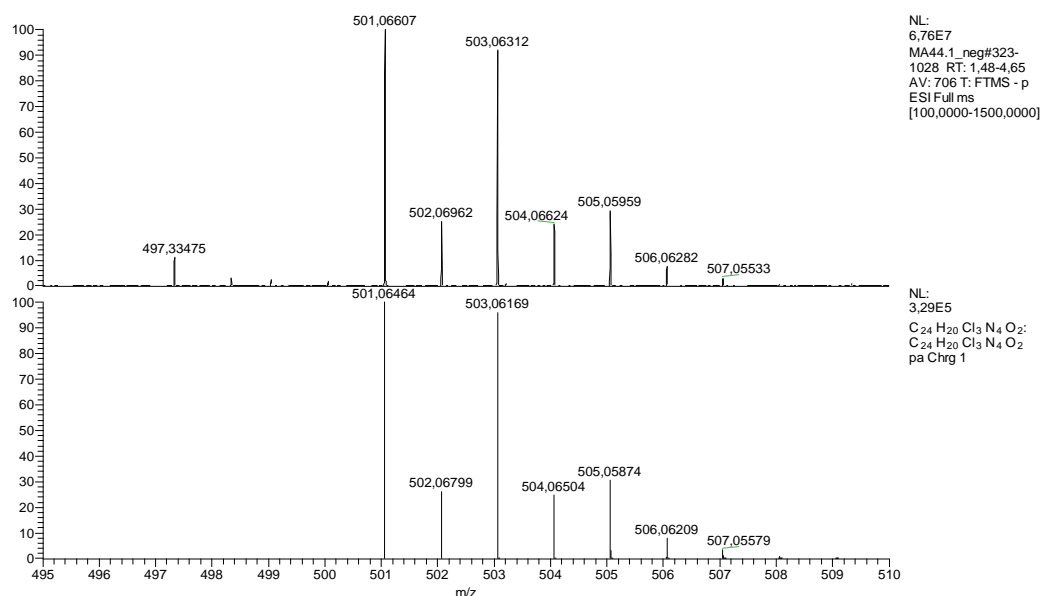

Elemental composition search on mass 501,07

m/z = 496,07-506,07

| m/z       | Theo. Mass | Delta (ppm) | RDB equiv. | Composition                                                                   |
|-----------|------------|-------------|------------|-------------------------------------------------------------------------------|
| 501,06607 | 501,06464  | 2,86        | 15,5       | C <sub>24</sub> H <sub>20</sub> O <sub>2</sub> N <sub>4</sub> Cl <sub>3</sub> |

**Figure S51.** HRMS data of (1*S*,4*S*)-8,10-dichloro-4-((7-chloro-1*H*-indol-3-yl)methyl)-1-isobutyl-1,2-dihydro-6*H*-pyrazino[2,1-*b*]quinazoline-3,6(4*H*)-dione (**12d**).

3. HPLC-DAD Purity Data

Table S1 HPLC-DAD purity data of compounds 1, 2, 12a-12d.

|   |                                                                      |  |
|---|----------------------------------------------------------------------|--|
| 1 |                                                                      |  |
|   |                                                                      |  |
|   | Reference spectrum: Apex at 3.283 Min<br>Total peak purity: 0.977667 |  |
|   |                                                                      |  |
| 2 |                                                                      |  |
|   |                                                                      |  |
|   | Reference spectrum: Apex at 4.350 Min<br>Total peak purity: 0.953489 |  |
|   |                                                                      |  |

12a

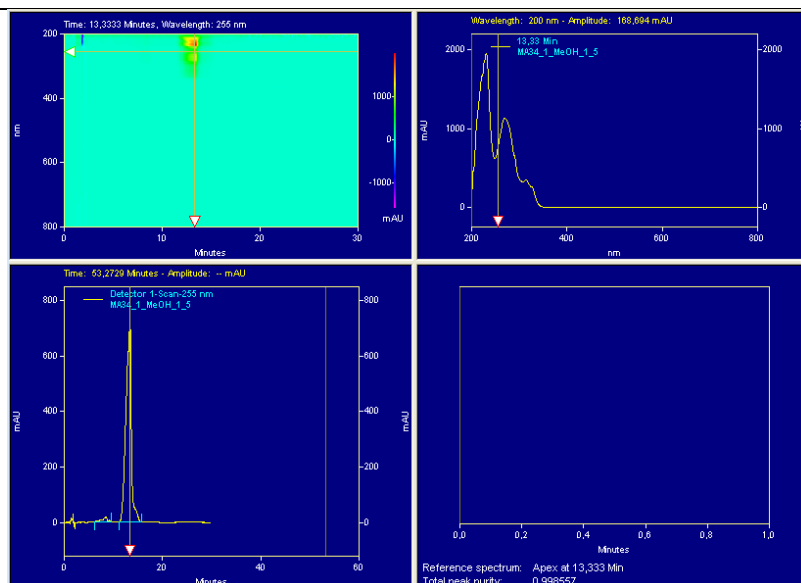

12b

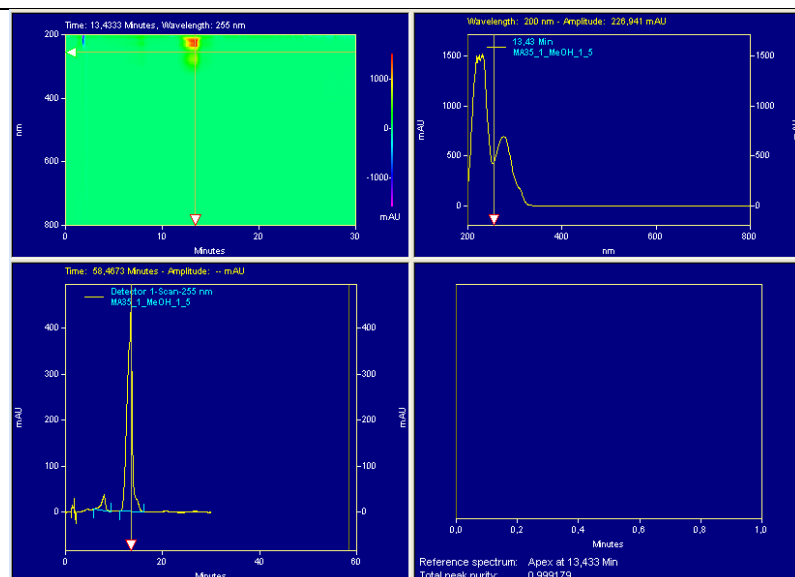

12c

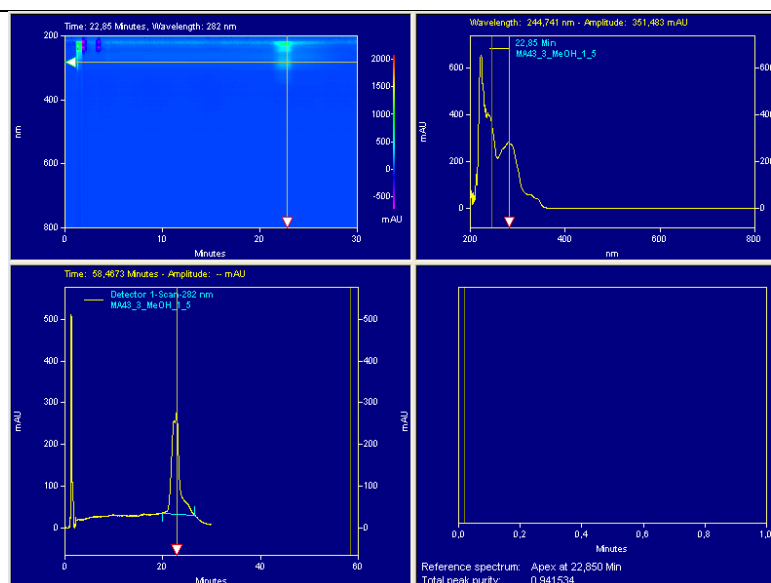

12d

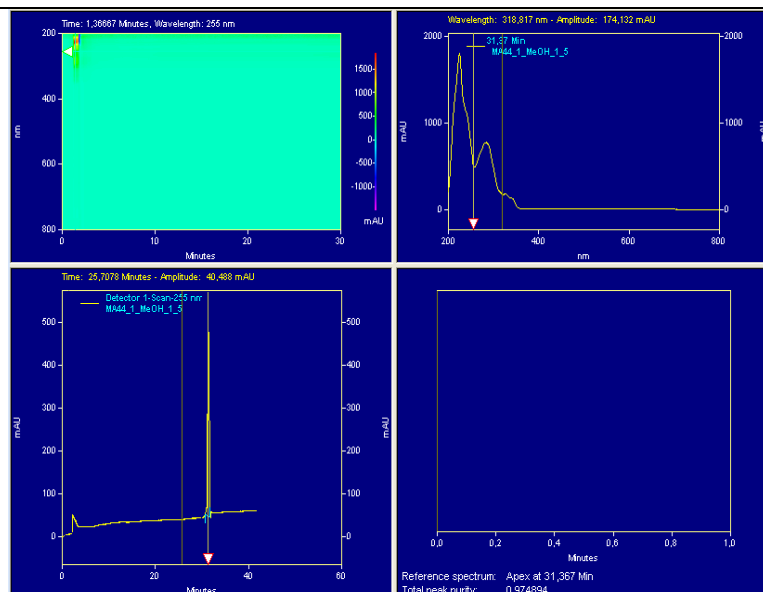

## 4. Enantiomeric Excess Data

**Table S2** HPLC-DAD data from enantiomeric excess of compounds **1**, **2**, **12a-12d**.

| Compound   | Chromatogram                                                                        | Retention time   |
|------------|-------------------------------------------------------------------------------------|------------------|
| <b>1</b>   | 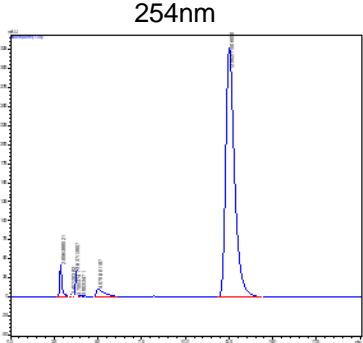   | <b>12.50 min</b> |
| <b>2</b>   |   | <b>66.16 min</b> |
| <b>12a</b> |  | <b>18.48 min</b> |
| <b>12b</b> |  | <b>12.27 min</b> |

|     |                                                                                   |           |
|-----|-----------------------------------------------------------------------------------|-----------|
| 12c | 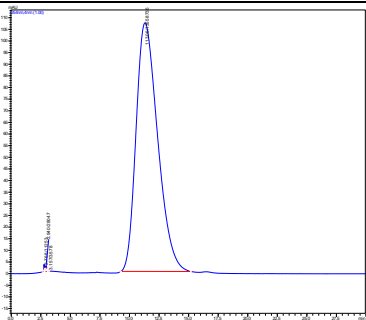 | 10.66 min |
| 12d |  | 25.41 min |

## 5. Docking studies

**Table S3.** Docking scores of the derivatives **1**, **2**, **4**, **12a-12d**, **13a-13d** and controls doxorubicin and reserpine.

| Compounds          | Docking scores (kcal/mol) |      |      |      |      |      |      |
|--------------------|---------------------------|------|------|------|------|------|------|
|                    | AcrB                      |      | AcrA |      | ToIC | NorA |      |
|                    | SBS                       | HT   | HH   | LD   |      | BCR  | CS   |
| <b>1</b>           | -8.9                      | -7.3 | -6.7 | -5.7 | -8.4 | -7.0 | -6.3 |
| <b>2</b>           | -8.5                      | -7.4 | -7.8 | -4.1 | -8.6 | -4.5 | -6.1 |
| <b>4</b>           | -9.0                      | -5.1 | -7.4 | -3.5 | -8.1 | -1.0 | -5.4 |
| <b>12a</b>         | -8.9                      | -6.9 | -7.3 | -6.0 | -8.3 | -5.5 | -5.7 |
| <b>12b</b>         | -8.9                      | -6.5 | -7.4 | -5.4 | -8.7 | -7.1 | -5.5 |
| <b>12c</b>         | -9.5                      | -2.7 | -5.8 | -2.7 | -7.6 | -3.8 | -5.1 |
| <b>12d</b>         | -8.7                      | -6.5 | -7.2 | -3.3 | -7.8 | -0.6 | -5.6 |
| <b>13a</b>         | -8.8                      | -6.1 | -6.3 | -5.4 | -7.5 | -2.9 | -5.4 |
| <b>13b</b>         | -8.4                      | -7.1 | -7.4 | -3.3 | -7.6 | -3.5 | -4.9 |
| <b>13c</b>         | -8.9                      | -7.0 | -6.7 | -6.1 | -7.9 | -2.2 | -5.5 |
| <b>13d</b>         | -10.8                     | -5.6 | -8.5 | -2.7 | -8.9 | -2.1 | -3.9 |
| <b>Doxorubicin</b> | -8.9                      | 15.4 | -7.2 | -5.6 | -7.2 | -    | -    |
| <b>Reserpine</b>   | -                         | -    | -    | -    | -    | 1.0  | -4.6 |

**SBS:** Substrate-binding site; **HT:** Hydrophobic trap; **HH:** Helical hairpin; **LD:** Lipoyl domain; **BCR:** Binding core region; **CS:** Cytoplasmic side; **TMD:** Transmembrane domain; **NBD:** Nucleotide binding domain.

Concerning the higher predicted affinity of the compounds to the CS of the NorA homology models, this was the site chosen for molecular visualization of the compounds effective in the inhibition of ethidium bromide efflux in the *S. aureus* 272123 model. Upon a first inspection, it can be noted that compounds **12a** (pink) and **13c** (orange) have a predicted binding site different than all the other compounds (Figure S52) and did not show any hydrogen interactions with neighboring residues. However, weaker interaction may still happen, such as van der Waals.



A closer look into the predicted interactions of compounds **4** (Figure S52B), **12b** (Figure S52C), **12c** (Figure S52D), and **13b** (Figure S52E) show a hydrogen bond with Asn-128, a polar residue. On a different note, compound **13a** (Figure S52F) is predicted to interact with the non-polar residue Gly-305. However, it must be taken into account that there is no evidence that the compounds are inhibiting NorA, and that these docking studies were performed in a homology model, which may not reflect the real residues involved.

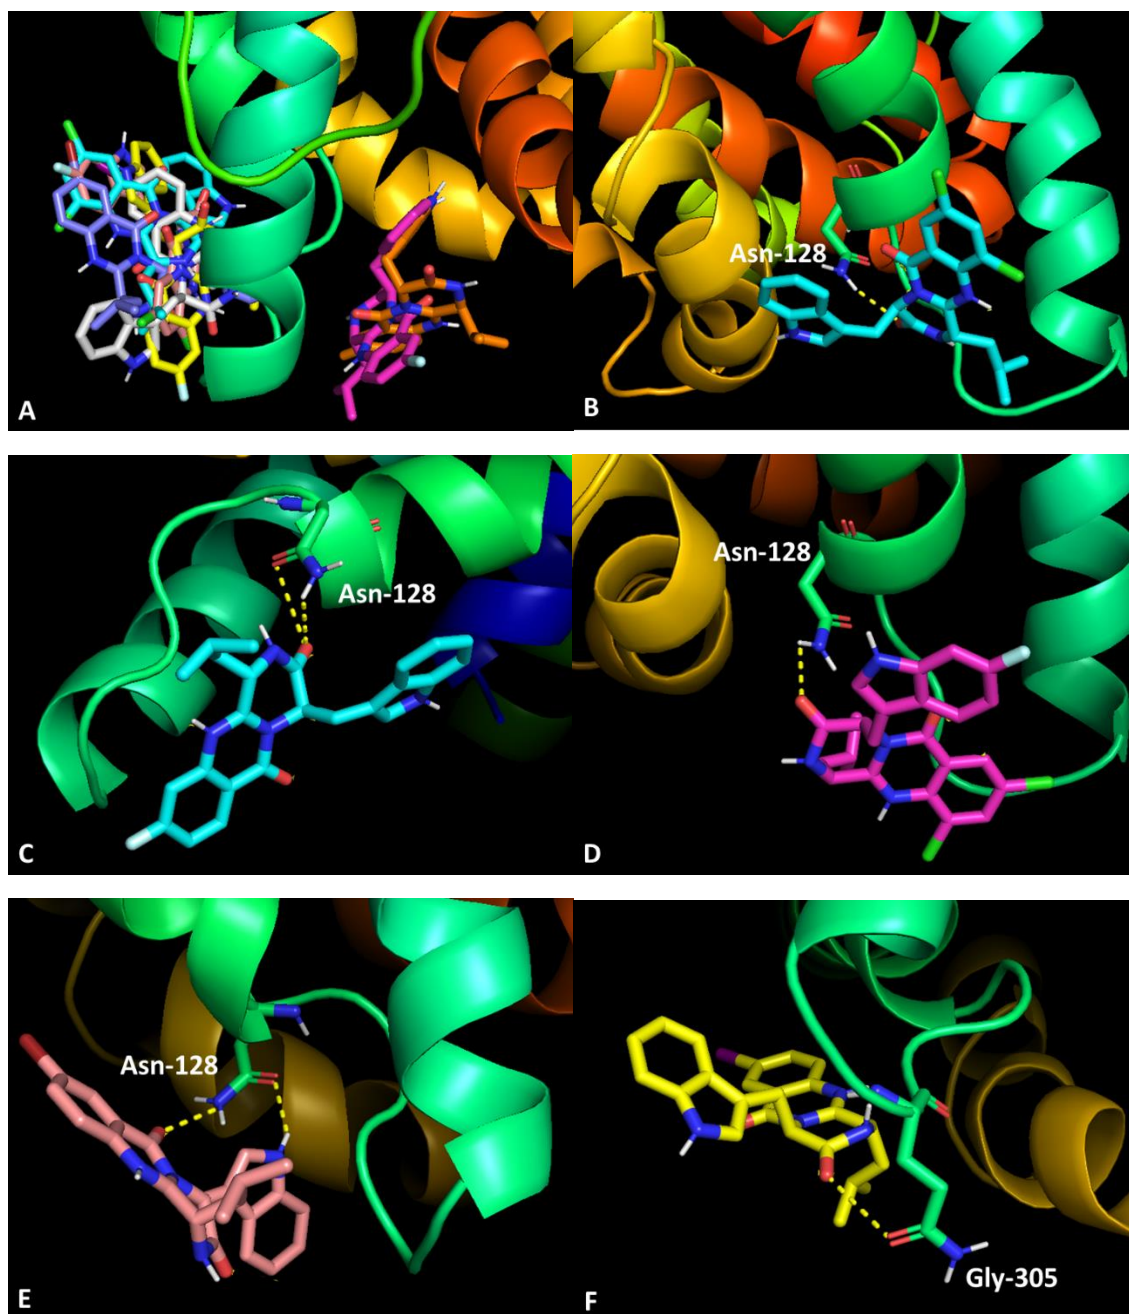

**Figure S52.** Molecular visualization of derivatives in the CS of NorA. (A) General view of the compounds in the CS; (B) Interaction between compound **4** and the CS; (C) Interaction between compound **12b** and the CS; (D) Interaction between compound **12c** and the CS; (E) Interaction between compound **13b** and the CS; (F) Interaction between compound **13a** and the CS.
